# Supplementary material
Source: PubMed Central journal article supplement (PMC2687076)
Supplement: NIHMS4360-supplement-S1.pdf [file NIHMS4360-supplement-S1.pdf]

## **SUPPLEMENTARY ONLINE MATERIAL**

### **Identification of ten loci associated with height highlights new biological pathways in human growth**

Guillaume Lettre, Anne U. Jackson<sup>¶</sup>, Christian Gieger<sup>¶</sup>, Fredrick R. Schumacher<sup>¶</sup>, Sonja I. Berndt<sup>¶</sup>, Serena Sanna<sup>¶</sup>, Susana Eyheramendy, Benjamin F. Voight, Johannah L. Butler, Candace Guiducci, Rachel Hackett, Iris M. Heid, Thomas Illig, Kevin B. Jacobs, Valeriya Lyssenko, Manuela Uda, The Diabetes Genetics Initiative, FUSION, KORA, The Prostate, Lung Colorectal and Ovarian Cancer Screening Trial, The Nurses' Health Study, SardiNIA, Michael Boehnke, Stephen J. Chanock, Leif C. Groop, Frank B. Hu, Bo Isomaa, Peter Kraft, Leena Peltonen, Veikko Salomaa, David Schlessinger, David J. Hunter, Richard B. Hayes, Gonçalo R. Abecasis, H.-Erich Wichmann, Karen L. Mohlke, Joel N. Hirschhorn<sup>†</sup>

<sup>¶</sup> These authors contributed equally

<sup>†</sup> Correspondence to:

Joel N. Hirschhorn  
Division of Genetics and Program in Genomics  
Children's Hospital  
300 Longwood Avenue, Boston, MA 02115  
Phone: 617-919-2129  
Fax: 617-730-0253  
E-mail: joelh@broad.mit.edu

## Supplementary Methods

Protocols from each group were approved by the respective Institutional Review Board, and informed consent was obtained for all subjects.

### 1. Description of genome-wide association study samples

#### *a. Diabetes Genetics Initiative (DGI)*

The individuals analyzed by the DGI have been described elsewhere<sup>1</sup> and a description of the sample is also available online (<http://www.broad.mit.edu/diabetes/>). In total, 1,464 T2D cases and 1,467 matched controls of European ancestry from Finland and Sweden were genotyped on the Affymetrix 500K platform. This includes 2,097 unrelated individuals (1,022 cases and 1,075 controls) and 326 discordant sibships (834 individuals: 442 cases and 392 controls). Genotyping data, as well as body mass index (BMI), and its components, height and weight, were available for 3,025 individuals (2,931 individuals from the T2D study, and an extra 94 individuals which were not used in the T2D association analysis).

#### *b. Finland-United States Investigation of Non-Insulin-Dependent Diabetes Mellitus Genetics (FUSION)*

The FUSION genome-wide association (GWA) study included 1,161 Finnish type 2 diabetes (T2D) cases, 1,174 normal glucose tolerant (NGT) controls, and 122 offspring of case/control pairs<sup>2</sup>. Cases and controls were matched as previously described, taking into account age, sex, and birth province within Finland. For the height analysis, our sample consisted of 1,084 T2D individuals and 1,287 NGT individuals with height measurements from clinical exams.

#### *c. KORA S3/F3 500K*

The KORA research platform (Cooperative health research in the Region of Augsburg) has evolved from the WHO MONICA study (Monitoring of Trends and Determinants of Cardiovascular Disease). The KORA genome-wide association study was recruited from the KORA S3 survey, which is a population-based sample from the general population living in the region of Augsburg, Southern Germany. The study participants had a German passport and were of European origin. The participants were examined in 1994/95 by applying standardized examinations that have been described in detail elsewhere<sup>3</sup>. In the KORA S3 study 4,856 subjects, aged 25 to 74 years, have been examined. 3,006 subjects participated in a follow-up examination of S3 in 2004/05 (KORA F3). Informed consent has been given and the study has been approved by the local ethical committee. For the genome-wide KORA S3/F3 500K study we selected 1,644 subjects of KORA S3/F3 and genotyped them using the Affymetrix 500K Array Set. The phenotypes were taken from KORA S3.

#### *d. Nurses' Health Study (NHS)*

The NHS is a longitudinal study established in 1976 when 121,700 female registered nurses between the ages of 30 and 55 completed a self-administered questionnaire on their medical histories and baseline health related exposures<sup>4</sup>. Between 1989 and 1990,

blood samples were collected from 32,826 of the cohort members. Subsequent follow-up has been greater than 98% for this subcohort. Height and weight information was collected by self-report on the baseline questionnaire and available for 2,286 women. As previously reported<sup>5</sup>, 1,145 postmenopausal women of European ancestry with invasive breast cancer and 1,142 matched controls of European ancestry were genotyped at the NCI Core Genotyping Facility using the Sentrix HumanHap550 genotyping assay according to the manufacturer's protocol.

***e. Prostate, Lung, Colorectal and Ovarian Cancer Screening Trial (PLCO)***

PLCO is a multicenter, randomized trial to evaluate screening methods for the early detection of prostate, lung, colorectal and ovarian cancer<sup>6</sup>. Between 1993 and 2001, over 150,000 men and women ages 55-74 years were recruited from ten centers in the United States (Birmingham, AL; Denver, CO; Detroit, MI; Honolulu, HI; Marshfield, WI; Minneapolis, MN; Pittsburgh, PA; Salt Lake City, UT; St. Louis, MO; and Washington, D.C.). As described elsewhere<sup>7</sup>, 1,172 non-Hispanic white prostate cancer cases and 1,105 matched, non-Hispanic white controls (by single sampling) were selected and genotyped using the Illumina HumanHap300 and HumanHap240 platforms. Information on height and weight was collected by self-report on the baseline questionnaire and available for 2,261 men.

***f. SardiNIA***

The SardiNIA GWAS examined a total of 4,305 related individuals participating in a longitudinal study of aging-related quantitative traits in the Ogliastra region of Sardinia, Italy<sup>8</sup>. As part of the initial clinical exam for the SardiNIA study, height was measured with a scale-mounted height rod. Due to medical conditions, height was not measurable on three individuals, and the height of another four participants was dropped because of short stature related to the Morquio syndrome. Genotyped individuals had four Sardinian grandparents and were selected for genotyping without regard to their phenotypic values.

**2. Description of follow-up samples**

***a. FINRISK97***

FINRISK 1997 is one of the population-based risk factor surveys carried out by the National Public Health Institute of Finland every five years<sup>9</sup>, and was approved by The Ethical Committee of the National Public Health Institute on Oct. 30th, 1996, decision number 38/96. The sample was drawn from the National Population register for five geographical areas (North Karelia, Kuopio, Oulu province, Helsinki and Vantaa, and Turku/Loimaa area) in Finland, and stratified so that the cell size was 250 per each sex, 10-year age group (range 25-64 years), and study area. In addition, there was a separate 'senior sample', which included 250 men and 500 women aged 65-74 years in the North Karelia and Helsinki/Vantaa area. Altogether, the sample size was 11,500 individuals. Of them, 8,447 (73.5%) participated. DNA sample and informed consent are available from 8,141 participants. Height was measured using a stadiometer with the participant standing straight, back against the height rule, without shoes, heavy outer garments, and hair ornaments. The result was recorded to a precision of 0.5 cm.

***b. European American and Poland extreme height panels***

The European American (N=2,189) sample is a tall-short study with subjects ranking in the 5<sup>th</sup>-10<sup>th</sup> percentiles in adult height (short) and in the 90<sup>th</sup>-95<sup>th</sup> percentiles in adult height (tall)<sup>10</sup>. All individuals were self-described “white” or “Caucasian”. All subjects were US-born and all of their grandparents were born in either the US or Europe. All subjects gave informed consent and approval was obtained from the Institutional Review Board of Children’s Hospital, Boston.

***c. FUSION stage 2***

The FUSION study includes a series of cases and controls matched to take into account age, sex, and birth province within Finland<sup>2</sup>. FUSION stage 2 samples do not overlap with the individuals used in the initial genome-wide association scan. Clinical height measurements were available for 1,208 type 2 diabetic and 1,258 normal glucose tolerant individuals.

***d. KORA S4***

The participants of KORA S4 were examined in 1999/2001 by applying the same standardized protocols than for the KORA S3 survey, and KORA S4 individuals do not overlap with genotyped individuals of the KORA F3 500K study. For KORA S4, 4,130 subjects (25-74 years old) were genotyped. Informed consent was given and the study was approved by the local ethical committee.

***e. PPP***

Prevalence, Prediction and Prevention of Diabetes (PPP) in the Botnia study – a population-based study started in 2004 aiming 1) to study diabetes prevalence in the Botnia population, 2) to test whether genetic and metabolic risk factors previously identified in the Botnia study can be used to identify high risk individuals and 3) to study whether incidence of T2D can be prevented in these high risk using intervention program. The PPP study today includes 3500 individuals.

### **3. Genotyping and quality-control assessment**

DGI. The genotyping of the DGI samples was performed using the Affymetrix 500K array. The DGI data SNP quality control and exclusion criteria are reported in detail elsewhere<sup>1</sup>. The quality-control (QC) criteria for sample and SNP exclusion were: (1) SNPs mapping to multiple locations in the genome, (2) SNPs with genotype call rate <95% in the unrelated component and <90% in the related component, (3) minor allele frequency (MAF) <1% in the DGI cases and <1% in both population and familial subsets of the data, and (4) Hardy-Weinberg equilibrium (HWE) P-value <1x10<sup>-6</sup>. This resulted in 386,731 SNPs being used for analyses.

FUSION. For the Fusion GWA scan, samples were genotyped with the Illumina Infinium II HumanHap300 BeadChip (version 1.0) and with an Illumina GoldenGate Custom Panel (1,536 SNPs) designed to improve genomic coverage around T2D candidate genes<sup>2</sup>. The QC criteria for sample and SNP exclusion were: SNPs with genotype call rate <95%, (2) MAF <1%, (3) HWE P-value <1x10<sup>-6</sup>, and (4) reproducibility in duplicate

samples and Mendelian inheritance (<3 total discrepancies in a combined set of 79 duplicate samples and 122 parent-offspring sets).

KORA. Genotyping of the KORA S3/F3 500K samples was performed using the Affymetrix 500K Array Set according to the manufacturer's recommendations. Genotypes were called using the BRLMM clustering algorithm. The QC criteria for sample and SNP exclusion were: (1) samples with genotype completeness <93% and (2) samples with at most one discordant call for 50 SNPs common to both chips.

NHS. The genotyping and quality control methods for the NHS samples have been described previously<sup>5</sup>. The samples were genotyped at the NCI Core Genotyping Facility using the Sentrix HumanHap550 genotyping assay. The QC criteria for sample and SNP exclusion were: (1) sample with genotype completeness <90%, (2) genotype call rate <90%, and (3) MAF <1%.

PLCO. Genotyping and quality control methods for the PLCO samples have been described elsewhere<sup>7</sup>. In brief, samples were genotyped using the Illumina HumanHap300 and HumanHap240. The QC criteria for sample and SNP exclusion were: (1) sample with genotype completeness <90%, (2) genotype call rate <94%, and (3) MAF <1%.

SardiNIA. Among the individuals examined, 1,412 were genotyped with the Affymetrix Mapping 500K Array Set. The QC criteria for sample and SNP exclusion were: (1) sample with genotype completeness <90%, (2) MAF <5%, (3) Mendelian transmission (<3 inconsistencies), and (4) HWE P-value <1x10<sup>-6</sup>. This passing set of 356,359 SNPs was used to impute all polymorphic SNPs genotyped by the HapMap consortium. In the SardiNIA GWAS, the average predicted  $r^2$  between imputed allele counts and true genotypes was 0.86. We compared imputed genotypes with those obtained by genotyping the Affymetrix Mapping 10K array in 436 individuals across 5,305 markers and observed an error rate of 2.17% per allele, similar to expectations (Y. Li and G.R.A., unpublished). Taking advantage of the relatedness among individuals in the SardiNIA sample, we conducted a second round of computational analysis to impute genotypes for analysis in an additional 2,893 individuals who were genotyped only with the Affymetrix Mapping 10K Array. In this second round, we identified large stretches of chromosome shared within each family and probabilistically “filled-in” genotypes within each stretch whenever one or more of its carriers was genotyped with the 500K Array Set<sup>11</sup>. These 2,893 individuals were mostly offspring and siblings of the 1,412 individuals genotyped at high density; typically, we genotyped two or three family members with the 500K Array Set in each large nuclear family and then imputed results for the remaining individuals.

Replication panels. Genotyping in the European American height panel and the replication panels FINRISK97, FUSION stage 2, and KORA S4 was performed using the platform iPLEX<sup>TM</sup> Sequenom MassARRAY® (P. Oeth, /http://www.sequenom.com/Assets/pdfs/appnotes/8876-006.pdf /(2005).). For the European American height panels, 78 SNPs were attempted and six failed. For the

FINRISK97 panel, 29 SNPs were attempted and two failed. For the PPP panel, 23 SNPs were attempted and 2 failed. For the FUSION stage 2 panel, 27 SNPs were attempted and one failed. For the KORA S4 panel, five SNPs were attempted and one failed. For all passing SNPs, the genotyping success rate was >96% and the consensus error rate, estimated from replicates, was <0.1%.

#### 4. Genotype imputation

Because the GWA scans used different genotyping platforms, we imputed genotypes for all polymorphic HapMap SNPs in each scan, using a Hidden Markov Model as programmed in MACH (Y. Li and G.R.A., unpublished). This approach allowed us to evaluate association at the same SNPs in all scans. The imputation method combines genotype data from each sample with the HapMap CEU samples (July 2006 phased haplotype release) and then infers the unobserved genotypes probabilistically. The inference relies on the identification of stretches of haplotype shared between study samples and individuals in HapMap CEU reference panel. For each SNP in each individual, imputation results are summarized as an “allele dosage” defined as the expected number of copies of the minor allele at that SNP (a fractional value between 0.0 and 2.0). As previously described,  $r^2$  between each imputed genotype and the true underlying genotype is estimated and serves as a QC metric (rsq\_hat in Supplementary Table 6). We chose an estimated  $r^2 > 0.3$  as a threshold to flag and discard low quality imputed SNPs (ref. 2, and Y. Li and G.R.A., unpublished). For association testing of imputed genotypes, we used the program MACH2QTL, which uses dosage value (0.0 - 2.0) as predictor in a linear regression framework.

#### 5. Statistical methods

##### *a. Phenotype modeling and association testing*

DGI. The height dataset was parsed into four groups to account for possible gender and disease status effects. Individuals with heights greater than four standard deviations from the mean were excluded ( $N=1$ ). Within each sub-group, height was corrected for age, and Z-scores were calculated based on the mean and standard deviation of the corrected height. Z-scores from the four sub-groups were then pooled, and regressed against the recruiting centers; the residuals were used as quantitative phenotypes in the analysis. Linear regression, as implemented in the software PLINK<sup>12</sup> or MACH2QTL, was used to test the association between SNP genotype and height Z-scores. To account for the presence of sibships in the dataset, we used a genomic control correction factor estimated from the median of the overall association statistics across the genome-wide association data. The inflation factors ( $\lambda_{GC}$ ) for both DGI controls and cases are 1.05.

FUSION (stage 1 and stage 2). Height was analyzed separately in type 2 diabetic and normal glucose tolerant individuals. For each sample, height was adjusted for sex, age, age<sup>2</sup>, birth province, and study group, then converted to Z-scores using quantile normalization. The Z-scores were then regressed against SNP reference allele counts using a score test that accounts for relatedness among samples<sup>11</sup>. The inflation factors

( $\lambda_{GC}$ ) for FUSION stage 1 NGT and cases are 1.02 and 1.01, respectively.

KORA (S3 and S4). Linear regression, as implemented in PLINK<sup>12</sup> or MACH2QTL, was used to test the correlation between genotype and height Z-scores, correcting for sex and age. The inflation factor ( $\lambda_{GC}$ ) for KORA F3 is 1.03.

NHS. After individuals with heights greater than four standard deviations from the mean were excluded (N=1), Z-scores were estimated using the mean and standard deviation from the remaining sample set. All analyses were adjusted for the top four eigenvectors estimated using EIGENSTRAT<sup>13</sup> and age at baseline. The Pearson's correlation coefficient for height vs. cancer is -0.033 (P-value=0.12). The association between height and the genotype dosage for imputed SNPs was evaluated using the linear regression model implemented in MACH2QTL. The inflation factor ( $\lambda_{GC}$ ) for NHS is 1.01.

PLCO. Individuals with heights greater than four standard deviations from the mean were excluded (N=3). To account for possible differences by disease status, height was corrected for age and Z-scores calculated using the mean and standard deviation separately for cases and controls. The Pearson's correlation coefficient for height vs. cancer is 0.008 (P-value=0.71). The pooled Z-scores were then regressed against the top four eigenvectors estimated using EIGENSTRAT<sup>13</sup> and the residuals were used for the analysis. The association between the SNPs and height was evaluated using the linear regression model implemented in PLINK<sup>12</sup> or MACH2QTL. The inflation factor ( $\lambda_{GC}$ ) for PLCO is 1.01.

SardiNIA. At each SNP, height was related to allele counts for a reference allele in a regression model that also included sex, age, and age<sup>2</sup> as covariates. For SNPs genotyped in the laboratory, allele counts were discrete (0, 1, or 2), whereas for imputed SNPs, allele counts were fractional (between 0.0 and 2.0, depending on the expected number of copies of the allele for each individual). To allow for relatedness, regression coefficients were estimated in the context of a variance components model that can handle imputed genotypes and accounts for background polygenic effects<sup>11</sup>. This method is implemented as a score test that is used to scan the genome in a computationally efficient manner<sup>11</sup>. To avoid inflation of type I error due to deviation from normality, we used quantile normalization (inverse normal scores), by ranking all height values and then converted them to Z-scores according to quantiles of the standard normal distribution.

European American height panel. Association analysis was performed using a Cochran-Mantel-Haenszel test. The dataset was stratified according to the European region of origin of the grandparents.

FINRISK97. Height Z-scores were generated after regressing the height measurements against sex, age, and regions of recruitment. Statistical analysis was performed using linear regression as implemented in PLINK<sup>12</sup>.

PPP. Height Z-scores were generated after regressing the height measurements against sex and age. Statistical analysis was performed using linear regression as implemented in

PLINK<sup>12</sup>.

### ***b. Meta-analysis and SNP selection for replication genotyping***

Association results presented in this manuscript take into account the posterior probability on each imputed genotype. To combine results, we used a weighted Z-score method:

$$z_w = z_i \times \sqrt{N_i / N_{tot}} ,$$

where  $z_w$  is the weighted Z-score from which the meta-analytic 2-tailed P-value is calculated,  $z_i$  is the Z-score from study  $i$  (calculated as the cumulative normal probability density for the corresponding 1-tailed P-value, adjusted if needed by subtracting the P-value from one when the directionality of the effect is reversed),  $N_i$  is the sample size of study  $i$  and  $N_{tot}$  is the total sample size. In total, we combined association results at 2,260,683 autosomal SNPs in 15,821 individuals (DGI,  $N=2,978$ ; FUSION,  $N=2,371$ ; KORA,  $N=1,639$ ; NHS,  $N=2,286$ ; PLCO,  $N=2,244$ ; SardiNIA,  $N=4,305$ ). To select markers for follow-up genotyping, we first ranked SNPs based on their meta-analytic P-value, and then clustered them based on the linkage disequilibrium pattern from the HapMap phase II European American (CEU) population to minimize redundant genotyping (SNPs with  $r^2 > 0.5$  to a SNP with a lower P-value were binned together with that SNP).

### ***c. Eigenstrat analysis***

For DGI, EIGENSTRAT<sup>13</sup> was run on a LD-pruned set of markers (~190,000 SNPs) using genotypes from unrelated individuals only ( $N=2,364$ ). Similar results were obtained when including the first three or ten main eigenvectors as covariates in the association analysis.

## References

1. Saxena, R. et al. Genome-wide association analysis identifies loci for type 2 diabetes and triglyceride levels. *Science* **316**, 1331-6 (2007).
2. Scott, L.J. et al. A genome-wide association study of type 2 diabetes in Finns detects multiple susceptibility variants. *Science* **316**, 1341-5 (2007).
3. Lowel, H. et al. The MONICA Augsburg surveys--basis for prospective cohort studies. *Gesundheitswesen* **67 Suppl 1**, S13-8 (2005).
4. Colditz, G.A. & Hankinson, S.E. The Nurses' Health Study: lifestyle and health among women. *Nat Rev Cancer* **5**, 388-96 (2005).
5. Hunter, D.J. et al. A genome-wide association study identifies alleles in FGFR2 associated with risk of sporadic postmenopausal breast cancer. *Nat Genet* **39**, 870-4 (2007).
6. Prorok, P.C. et al. Design of the Prostate, Lung, Colorectal and Ovarian (PLCO) Cancer Screening Trial. *Control Clin Trials* **21**, 273S-309S (2000).
7. Yeager, M. et al. Genome-wide association study of prostate cancer identifies a second risk locus at 8q24. *Nat Genet* **39**, 645-9 (2007).
8. Pilia, G. et al. Heritability of cardiovascular and personality traits in 6,148 Sardinians. *PLoS Genet* **2**, e132 (2006).
9. Vartiainen, E. et al. Cardiovascular risk factor changes in Finland, 1972-1997. *Int J Epidemiol* **29**, 49-56 (2000).
10. Campbell, C.D. et al. Demonstrating stratification in a European-American population. *Nature Genet*, 37:868-872 (2005).
11. Chen, W.M. & Abecasis, G.R. Family-based association tests for genomewide association scans. *Am J Hum Genet* **81**, 913-26 (2007).
12. Purcell, S. et al. PLINK: a tool set for whole-genome association and population-based linkage analyses. *Am J Hum Genet* **81**, 559-75 (2007).
13. Price, A.L. et al. Principal components analysis corrects for stratification in genome-wide association studies. *Nat Genet* **38**, 904-9 (2006).

**Supplementary Table 1.** Demographics of the populations used in this study

| STUDY                                    | SAMPLE SIZE | PERCENTAGE MALE (%) | MALES, AGE AT STUDY (years; mean, SD) | FEMALES, AGE AT STUDY (years; mean, SD) | MALES, HEIGHT AT STUDY (cm; mean, SD) | FEMALES, HEIGHT AT STUDY (cm; mean, SD) |
|------------------------------------------|-------------|---------------------|---------------------------------------|-----------------------------------------|---------------------------------------|-----------------------------------------|
| <b>GWA study samples</b>                 |             |                     |                                       |                                         |                                       |                                         |
| DGI (T2D)                                | 1728        | 50.6                | 63.1 (10.3)                           | 65.4 (10.5)                             | 174.3 (6.4)                           | 161.1 (6.2)                             |
| DGI (Controls)                           | 1648        | 48.6                | 58.4 (10.5)                           | 59.2 (10.3)                             | 175.6 (6.2)                           | 162.4 (5.9)                             |
| Fusion (T2D)                             | 1084        | 56.9                | 62.1(7.3)                             | 63.6(7.8)                               | 173.2(6.1)                            | 159.5(5.6)                              |
| Fusion (NGT)                             | 1287        | 49.7                | 60.4(11.6)                            | 61.5(10.8)                              | 174.2(6.6)                            | 160.7(6.1)                              |
| KORA S3 500K                             | 1644        | 49.5                | 53.0 (10.1)                           | 52.1 (10.1)                             | 173.7 (6.5)                           | 161.1 (6.0)                             |
| NHS                                      | 2286        | 0                   | Not applicable                        | 44.4 (6.4)                              | Not applicable                        | 164.0 (6.8)                             |
| PLCO                                     | 2261        | 100                 | 64.3 (5.1)                            | Not applicable                          | 178.4 (6.7)                           | Not applicable                          |
| SardiNIA                                 | 4305        | 43.8                | 44.1 (18.1)                           | 43.2 (17.3)                             | 166.3 (7.3)                           | 154.9 (6.5)                             |
|                                          |             |                     |                                       |                                         |                                       |                                         |
| <b>Replication samples</b>               |             |                     |                                       |                                         |                                       |                                         |
| European American (5th-10th percentile)  | 1057        | 48.0                | 57 (9)                                | 55 (10)                                 | 167.1 (1.4)                           | 153.2 (1.5)                             |
| European American (90th-95th percentile) | 1132        | 51.9                | 56 (9)                                | 54 (10)                                 | 186.9 (2.0)                           | 172.0 (1.8)                             |
| FINRISK97                                | 7803        | 46.3                | 47.9 (13.1)                           | 47.1 (12.7)                             | 175.6 (7.1)                           | 162.3 (6.3)                             |
| Fusion2 T2D                              | 1208        | 59.4                | 58.2(9.0)                             | 61.1(8.0)                               | 174.8(6.8)                            | 160.2(5.8)                              |
| Fusion2 NGT                              | 1258        | 61.0                | 57.2(7.6)                             | 60.5(7.4)                               | 174.5(6.2)                            | 160.5(6.3)                              |
| KORA S4                                  | 4130        | 49.4                | 49.6 (14.0)                           | 48.8 (13.8)                             | 174.8 (7.0)                           | 161.9 (6.6)                             |
| PPP                                      | 3402        | 47.4                | 49.3 (16.0)                           | 49.1 (16.0)                             | 177.0 (6.7)                           | 163.9 (6.2)                             |

**Supplementary Table 2. Association results in the European American (USHT) tall-short height panel.** Allele 1 corresponds to the minor allele in the USHT panel (minor allele frequency (MAF) is given for allele 1). The panel is treated as a case-control short (5<sup>th</sup>-10<sup>th</sup> percentiles in adult height) / tall (90<sup>th</sup>-95<sup>th</sup> percentiles in adult height) panel and analyzed using the stratified Cochran-Mantel-Haenszel test to account for the geographic origin of the grandparents (N=2,189). The odds ratio corresponds to the increased odds of being in the group of tall individuals for each additional minor allele (allele 1, positive strand in build NCBI35). SNPs in bold were promoted for genotyping in FINRISK97, KORA S4, PPP, and FUSION stage 2.

| Chromosome | Physical position | SNP               | Allele 1 | Allele 2 | MAF  | P-value              | Odds ratio | 95% CI OR   |
|------------|-------------------|-------------------|----------|----------|------|----------------------|------------|-------------|
| 1          | 17268067          | rs2076599         | G        | A        | 0.40 | 0.61                 | 0.97       | 0.86 - 1.09 |
| 1          | 78840137          | rs1413358         | A        | G        | 0.23 | 0.34                 | 0.93       | 0.81 - 1.08 |
| 1          | 118775455         | rs6428750         |          |          |      | FAILED               |            |             |
| 1          | 225920244         | rs6426470         | A        | G        | 0.19 | 0.21                 | 0.92       | 0.81 - 1.05 |
| 2          | 54707033          | rs4671964         |          |          |      | FAILED               |            |             |
| 2          | 103976172         | rs935070          | T        | C        | 0.15 | 0.15                 | 1.11       | 0.96 - 1.28 |
| 2          | 113826562         | rs2008324         | G        | A        | 0.48 | 0.34                 | 1.05       | 0.95 - 1.16 |
| 2          | 121684502         | rs4076519         | A        | G        | 0.14 | 0.35                 | 0.92       | 0.78 - 1.09 |
| 2          | 229919505         | rs6728087         | C        | A        | 0.44 | 0.58                 | 1.03       | 0.93 - 1.14 |
| 2          | 232514563         | rs2580823         | G        | A        | 0.30 | 0.06                 | 1.11       | 0.99 - 1.24 |
| 3          | 119581601         | rs575566          | A        | C        | 0.29 | 0.04                 | 0.89       | 0.80 - 0.99 |
| 3          | 128012494         | rs9858948         | A        | G        | 0.23 | 0.51                 | 1.05       | 0.91 - 1.21 |
| 3          | 139231669         | rs6780412         | T        | G        | 0.40 | 0.15                 | 1.09       | 0.97 - 1.24 |
| 3          | 142585523         | rs6763931         | A        | G        | 0.42 | 1.2x10 <sup>-7</sup> | 1.39       | 1.23 - 1.56 |
| 3          | 142588260         | <b>rs724016</b>   | G        | A        | 0.42 | 7.8x10 <sup>-8</sup> | 1.39       | 1.23 - 1.57 |
| 4          | 4327819           | <b>rs2916448</b>  | C        | T        | 0.12 | 0.25                 | 0.90       | 0.75 - 1.08 |
| 4          | 4330015           | rs2916446         | A        | T        | 0.13 | 0.24                 | 0.90       | 0.76 - 1.07 |
| 4          | 72695625          | rs17763915        | C        | T        | 0.12 | 0.54                 | 1.05       | 0.90 - 1.23 |
| 4          | 82373306          | <b>rs1662845</b>  | T        | A        | 0.45 | 8.5x10 <sup>-6</sup> | 1.31       | 1.17 - 1.48 |
| 4          | 145794294         | <b>rs1812175</b>  | A        | G        | 0.16 | 5.1x10 <sup>-8</sup> | 0.68       | 0.59 - 0.78 |
| 4          | 145869471         | <b>rs1492820</b>  | G        | A        | 0.47 | 0.0015               | 0.82       | 0.73 - 0.93 |
| 4          | 145873947         | rs7692915         | T        | G        | 0.49 | 0.0018               | 1.21       | 1.07 - 1.36 |
| 4          | 146058714         | rs4240326         | A        | G        | 0.46 | 0.015                | 1.16       | 1.03 - 1.31 |
| 4          | 174559706         | rs17325472        | C        | A        | 0.49 | 0.94                 | 1.00       | 0.88 - 1.12 |
| 5          | 4573856           | <b>rs1450822</b>  | A        | G        | 0.49 | 0.21                 | 1.08       | 0.96 - 1.22 |
| 5          | 32802174          | rs1173734         | C        | T        | 0.25 | 0.89                 | 1.01       | 0.88 - 1.16 |
| 5          | 77467642          | rs10514136        |          |          |      | FAILED               |            |             |
| 5          | 171463952         | rs6868347         | T        | C        | 0.14 | 0.39                 | 1.08       | 0.91 - 1.27 |
| 6          | 26341366          | <b>rs10946808</b> | G        | A        | 0.31 | 3.4x10 <sup>-8</sup> | 0.74       | 0.66 - 0.82 |
| 6          | 31617191          | rs3094001         | T        | C        | 0.17 | 0.22                 | 1.10       | 0.94 - 1.29 |
| 6          | 105514355         | <b>rs314277</b>   | A        | C        | 0.14 | 0.26                 | 1.10       | 0.93 - 1.31 |
| 6          | 142733242         | rs11155242        |          |          |      | FAILED               |            |             |

|    |           |                   |   |   |      |                      |      |             |
|----|-----------|-------------------|---|---|------|----------------------|------|-------------|
| 6  | 142745570 | <b>rs4896582</b>  | A | G | 0.32 | $2.2 \times 10^{-5}$ | 0.76 | 0.67 - 0.86 |
| 7  | 42501378  | rs1991769         | T | C | 0.34 | 0.019                | 0.88 | 0.79 - 0.98 |
| 7  | 50632416  | <b>rs12540874</b> | G | A | 0.40 | 0.98                 | 1.00 | 0.90 - 1.11 |
| 7  | 92094841  | <b>rs2040494</b>  | C | T | 0.46 | 0.18                 | 0.92 | 0.82 - 1.04 |
| 7  | 158417550 | <b>rs2730245</b>  | G | C | 0.30 | 0.99                 | 1.00 | 0.88 - 1.14 |
| 8  | 41596148  | <b>rs11786297</b> | G | A | 0.09 | 0.39                 | 1.10 | 0.89 - 1.35 |
| 8  | 57318152  | <b>rs9650315</b>  | T | G | 0.14 | $9.0 \times 10^{-6}$ | 0.68 | 0.57 - 0.81 |
| 8  | 76362525  | rs12681390        | G | A | 0.44 | 0.45                 | 1.05 | 0.93 - 1.18 |
| 8  | 76364801  | rs982442          | T | C | 0.42 | 0.29                 | 1.07 | 0.95 - 1.20 |
| 8  | 80009731  | rs1443899         | G | A | 0.12 | 0.68                 | 1.03 | 0.88 - 1.21 |
| 8  | 129118629 | <b>rs13249999</b> | T | C | 0.08 | 0.59                 | 0.94 | 0.75 - 1.18 |
| 9  | 118174617 | <b>rs7869550</b>  | G | A | 0.18 | 0.58                 | 0.96 | 0.82 - 1.12 |
| 9  | 132453905 | <b>rs7466269</b>  | G | A | 0.34 | 0.48                 | 0.96 | 0.87 - 1.07 |
| 10 | 27944181  | rs2451928         | G | A | 0.39 | 0.50                 | 0.96 | 0.85 - 1.08 |
| 10 | 124069073 | rs7081388         | T | C | 0.05 | 0.42                 | 0.91 | 0.72 - 1.14 |
| 10 | 124154644 | rs10082476        | G | A | 0.22 | 0.66                 | 0.97 | 0.86 - 1.10 |
| 11 | 25426266  | rs2618792         | G | A | 0.47 | 0.82                 | 0.99 | 0.87 - 1.11 |
| 12 | 64644614  | <b>rs1042725</b>  | T | C | 0.48 | $4.2 \times 10^{-6}$ | 0.79 | 0.71 - 0.87 |
| 13 | 19621698  | rs1041028         | T | C | 0.46 | 0.023                | 0.87 | 0.77 - 0.98 |
| 13 | 37037260  | rs9315503         | G | A | 0.35 | 0.38                 | 0.95 | 0.86 - 1.06 |
| 13 | 49405945  | rs4942899         | C | T | 0.22 | 0.036                | 1.16 | 1.01 - 1.33 |
| 14 | 36069800  | <b>rs17104630</b> | G | A | 0.09 | 0.018                | 0.77 | 0.62 - 0.96 |
| 14 | 91477446  | <b>rs3783937</b>  | T | C | 0.23 | 0.015                | 0.86 | 0.77 - 0.97 |
| 14 | 91520137  | rs2295164         |   |   |      | FAILED               |      |             |
| 14 | 91529711  | <b>rs8007661</b>  | T | C | 0.43 | 0.64                 | 0.97 | 0.86 - 1.10 |
| 14 | 93843698  | rs8022616         | G | A | 0.10 | 0.99                 | 1.00 | 0.84 - 1.19 |
| 15 | 77391837  | <b>rs11858942</b> | G | A | 0.40 | 0.54                 | 1.04 | 0.92 - 1.17 |
| 15 | 82055408  | rs2585071         | G | A | 0.35 | 0.46                 | 0.95 | 0.84 - 1.08 |
| 15 | 82077496  | <b>rs2562784</b>  | G | A | 0.24 | 0.28                 | 1.07 | 0.95 - 1.20 |
| 15 | 97798792  | rs4965490         | T | C | 0.18 | 0.11                 | 1.13 | 0.97 - 1.32 |
| 16 | 615681    | <b>rs763014</b>   | C | T | 0.42 | 0.046                | 1.13 | 1.00 - 1.28 |
| 16 | 2225358   | <b>rs26840</b>    | T | C | 0.40 | 0.015                | 1.16 | 1.03 - 1.31 |
| 17 | 51785154  | <b>rs12449568</b> | C | T | 0.45 | 0.49                 | 1.04 | 0.93 - 1.18 |
| 17 | 68208939  | rs9905659         | G | A | 0.19 | 0.14                 | 0.91 | 0.80 - 1.03 |
| 17 | 76303498  | rs7211818         | G | A | 0.23 | 0.12                 | 1.10 | 0.98 - 1.24 |
| 18 | 48613000  | <b>rs12958987</b> | T | G | 0.28 | 0.69                 | 0.97 | 0.85 - 1.11 |
| 19 | 2121954   | <b>rs12986413</b> | T | A | 0.48 | 0.20                 | 0.93 | 0.82 - 1.04 |
| 20 | 5034939   | <b>rs6116651</b>  | T | A | 0.11 | 0.0035               | 0.75 | 0.62 - 0.91 |
| 20 | 32065590  | rs6141443         | G | C | 0.16 | 0.021                | 0.83 | 0.71 - 0.97 |
| 20 | 33194125  | rs3746427         | A | G | 0.46 | 0.019                | 0.87 | 0.77 - 0.98 |
| 20 | 33262941  | rs6088765         | G | T | 0.42 | 0.23                 | 1.08 | 0.95 - 1.21 |
| 20 | 33370575  | <b>rs6060369</b>  | C | T | 0.38 | 0.012                | 1.17 | 1.04 - 1.32 |
| 20 | 33431481  | rs725908          |   |   |      | FAILED               |      |             |
| 20 | 33489397  | rs143383          | G | A | 0.37 | 0.034                | 1.14 | 1.01 - 1.29 |
| 20 | 39154787  | rs2076574         | G | A | 0.13 | 0.52                 | 1.05 | 0.91 - 1.22 |
| 22 | 40075301  | rs2281331         | A | G | 0.49 | 0.75                 | 0.98 | 0.87 - 1.11 |

**Supplementary Table 3. Association results in the FINRISK97 panel.** Allele 1 corresponds to the minor allele in FINRISK97 (N=7803). Effect sizes and standard errors are given in s.d. units. The direction of the effect is for allele 1 (positive strand in build NCBI35).

| Chromosome | Physical position | SNP        | Allele 1 | Allele 2 | MAF  | P-value              | Effect size | Standard error |
|------------|-------------------|------------|----------|----------|------|----------------------|-------------|----------------|
| 3          | 142588260         | rs724016   | G        | A        | 0.44 | $4.3 \times 10^{-8}$ | 0.087       | 0.016          |
| 4          | 4327819           | rs2916448  | C        | T        | 0.06 | 0.41                 | 0.028       | 0.034          |
| 4          | 82373306          | rs1662845  | T        | A        | 0.43 | 0.93                 | -0.001      | 0.016          |
| 4          | 145869471         | rs1492820  | G        | A        | 0.41 | 0.035                | -0.034      | 0.016          |
| 5          | 4573856           | rs1450822  | A        | G        |      | FAILED               |             |                |
| 6          | 26341366          | rs10946808 | G        | A        | 0.43 | $4.9 \times 10^{-5}$ | -0.065      | 0.016          |
| 6          | 105514355         | rs314277   | A        | C        | 0.17 | 0.41                 | 0.018       | 0.021          |
| 6          | 142745570         | rs4896582  | A        | G        | 0.29 | $1.4 \times 10^{-9}$ | -0.105      | 0.017          |
| 7          | 50632416          | rs12540874 | G        | A        | 0.31 | 0.62                 | -0.009      | 0.017          |
| 7          | 92094841          | rs2040494  | C        | T        | 0.47 | 0.0050               | -0.045      | 0.016          |
| 7          | 158417550         | rs2730245  | G        | C        | 0.25 | 0.38                 | 0.016       | 0.018          |
| 8          | 41596148          | rs11786297 | G        | A        | 0.04 | 0.063                | 0.072       | 0.039          |
| 8          | 57318152          | rs9650315  | T        | G        | 0.12 | 0.021                | -0.056      | 0.024          |
| 8          | 129118629         | rs13249999 | T        | C        | 0.07 | 0.30                 | -0.032      | 0.031          |
| 9          | 118174617         | rs7869550  | G        | A        | 0.21 | 0.10                 | -0.032      | 0.019          |
| 9          | 132453905         | rs7466269  | G        | A        | 0.44 | 0.047                | -0.032      | 0.016          |
| 12         | 64644614          | rs1042725  | T        | C        | 0.47 | $5.1 \times 10^{-5}$ | -0.064      | 0.016          |
| 14         | 36069800          | rs17104630 | G        | A        | 0.10 | 0.021                | -0.061      | 0.026          |
| 14         | 91477446          | rs3783937  | T        | C        | 0.24 | 0.59                 | -0.010      | 0.018          |
| 14         | 91529711          | rs8007661  | T        | C        | 0.47 | 0.0015               | -0.051      | 0.016          |
| 15         | 77391837          | rs11858942 | G        | A        | 0.33 | 0.96                 | 0.001       | 0.017          |
| 15         | 82077496          | rs2562784  | G        | A        | 0.26 | 0.00055              | 0.062       | 0.018          |
| 16         | 615681            | rs763014   | T        | C        | 0.50 | 0.96                 | -0.001      | 0.016          |
| 16         | 2225358           | rs26840    | T        | C        |      | FAILED               |             |                |
| 17         | 51785154          | rs12449568 | C        | T        | 0.48 | 0.64                 | 0.007       | 0.016          |
| 18         | 48613000          | rs12958987 | T        | G        | 0.33 | 0.16                 | 0.024       | 0.017          |
| 19         | 2121954           | rs12986413 | T        | A        | 0.46 | 0.21                 | 0.020       | 0.016          |
| 20         | 5034939           | rs6116651  | T        | A        | 0.06 | 0.67                 | 0.014       | 0.032          |
| 20         | 33370575          | rs6060369  | C        | T        | 0.45 | 0.0014               | 0.051       | 0.016          |

**Supplementary Table 4. Association results in KORA S4.** Allele 1 corresponds to the minor allele in KORA S4 (N=4130). Effect sizes and standard errors are given in s.d. units. The direction of the effect is for allele 1 (positive strand, build NCBI35).

| Chromosome | Physical position | SNP        | Allele 1 | Allele 2 | MAF  | P-value | Effect size | Standard error |
|------------|-------------------|------------|----------|----------|------|---------|-------------|----------------|
| 3          | 142588260         | rs724016   | G        | A        | 0.43 | 0.021   | 0.024       | 0.011          |
| 4          | 145869471         | rs1492820  | G        | A        | 0.44 | 0.0045  | -0.030      | 0.011          |
| 6          | 26341366          | rs10946808 | G        | A        | 0.29 | 0.035   | -0.024      | 0.012          |
| 6          | 142745570         | rs4896582  | A        | G        | 0.31 | 0.0047  | -0.033      | 0.012          |
| 20         | 33370575          | rs6060369  | C        | T        |      | FAILED  |             |                |

**Supplementary Table 5. Association results in PPP.** Allele 1 corresponds to the minor allele in PPP (N=3402). Effect sizes and standard errors are given in s.d. units. The direction of the effect is for allele 1 (positive strand, build NCBI35).

| Chromosome | Physical position | SNP        | Allele 1 | Allele 2 | MAF   | P-value              | Effect size | Standard error |
|------------|-------------------|------------|----------|----------|-------|----------------------|-------------|----------------|
| 3          | 142588260         | rs724016   | A        | G        | 0.496 | 0.00059              | -0.083      | 0.024          |
| 4          | 4327819           | rs2916448  | G        | A        | 0.07  | 0.26                 | -0.056      | 0.049          |
| 4          | 82373306          | rs1662845  | A        | T        | 0.44  | 0.16                 | 0.033       | 0.024          |
| 4          | 145869471         | rs1492820  | C        | T        | 0.44  | 0.051                | -0.048      | 0.025          |
| 5          | 4573856           | rs1450822  |          |          |       | FAILED               |             |                |
| 6          | 26341366          | rs10946808 | G        | A        | 0.35  | 0.0022               | -0.078      | 0.025          |
| 6          | 105514355         | rs314277   | A        | C        | 0.17  | 0.12                 | 0.050       | 0.032          |
| 7          | 50632416          | rs12540874 | G        | A        | 0.36  | 0.54                 | -0.016      | 0.025          |
| 7          | 92094841          | rs2040494  | C        | T        | 0.49  | 0.35                 | -0.023      | 0.024          |
| 8          | 41596148          | rs11786297 | G        | A        | 0.05  | 0.16                 | 0.076       | 0.054          |
| 8          | 129118629         | rs13249999 |          |          |       | FAILED               |             |                |
| 9          | 118174617         | rs7869550  | G        | A        | 0.29  | 0.050                | -0.052      | 0.027          |
| 9          | 132453905         | rs7466269  | G        | A        | 0.39  | 0.11                 | -0.039      | 0.025          |
| 12         | 64644614          | rs1042725  | T        | C        | 0.49  | $9.5 \times 10^{-6}$ | -0.106      | 0.024          |
| 14         | 36069800          | rs17104630 | G        | A        | 0.09  | 0.54                 | 0.026       | 0.043          |
| 14         | 91477446          | rs3783937  | A        | G        | 0.26  | 0.39                 | -0.023      | 0.027          |
| 15         | 77391837          | rs11858942 | G        | A        | 0.31  | 0.94                 | 0.0021      | 0.026          |
| 16         | 615681            | rs763014   | T        | C        | 0.48  | 0.0045               | -0.070      | 0.025          |
| 16         | 2225358           | rs26840    | T        | C        | 0.45  | 0.065                | 0.045       | 0.024          |
| 17         | 51785154          | rs12449568 | T        | C        | 0.49  | 0.022                | -0.055      | 0.024          |
| 19         | 2121954           | rs12986413 | T        | A        | 0.45  | 0.0029               | 0.073       | 0.025          |
| 20         | 5034939           | rs6116651  | T        | A        | 0.09  | 0.42                 | -0.034      | 0.042          |
| 20         | 33370575          | rs6060369  | C        | T        | 0.42  | 0.0014               | 0.078       | 0.024          |

**Supplementary Table 6. Association results in the FUSION stage 2 panel (N=2466).** Effect sizes and standard errors are given in s.d. units. The direction of the effect is for the reference allele (positive strand in build NCBI35).

| Chr | Physical position | SNP        | Ref. allele | FUSION2 CTRL |                |         | FUSION2 T2D |                |         |
|-----|-------------------|------------|-------------|--------------|----------------|---------|-------------|----------------|---------|
|     |                   |            |             | MAF          | Beta (se)      | P-value | MAF         | Beta (se)      | P-value |
| 3   | 142588260         | rs724016   | A           | 0.45         | -0.055 (0.04)  | 0.17    | 0.45        | -0.006 (0.042) | 0.88    |
| 4   | 4327819           | rs2916448  | T           | 0.07         | 0.014 (0.08)   | 0.86    | 0.07        | -0.12 (0.082)  | 0.14    |
| 4   | 82373306          | rs1662845  | A           | 0.43         | -0.121 (0.041) | 0.0034  | 0.44        | -0.069 (0.042) | 0.099   |
| 4   | 145794294         | rs1812175  | G           | 0.16         | 0.03 (0.054)   | 0.58    | 0.16        | -0.099 (0.056) | 0.077   |
| 4   | 145869471         | rs1492820  | A           | 0.41         | 0.051 (0.041)  | 0.21    | 0.41        | -0.025 (0.041) | 0.54    |
| 5   | 4573856           | rs1450822  | G           | 0.5          | 0.012 (0.041)  | 0.78    | 0.49        | -0.058 (0.042) | 0.17    |
| 6   | 26341366          | rs10946808 | A           | 0.46         | 0.123 (0.04)   | 0.0022  | 0.43        | 0.086 (0.041)  | 0.035   |
| 6   | 105514355         | rs314277   | C           | 0.14         | -0.095 (0.061) | 0.12    | 0.17        | -0.073 (0.055) | 0.18    |
| 6   | 142745570         | rs4896582  | G           | 0.28         | 0.056 (0.045)  | 0.21    | 0.27        | 0.084 (0.048)  | 0.080   |
| 7   | 50632416          | rs12540874 | A           | 0.3          | -0.05 (0.044)  | 0.26    | 0.3         | -0.041 (0.045) | 0.36    |
| 7   | 92094841          | rs2040494  | T           | 0.46         | 0.078 (0.041)  | 0.053   | 0.47        | -0.01 (0.041)  | 0.80    |
| 7   | 158417550         | rs2730245  | C           | 0.24         | -0.097 (0.047) | 0.040   | 0.23        | -0.023 (0.05)  | 0.36    |
| 8   | 41596148          | rs11786297 | A           | 0.04         | -0.023 (0.107) | 0.83    | 0.04        | 0.189 (0.108)  | 0.080   |
| 8   | 57318152          | rs9650315  | G           | 0.13         | 0.069 (0.062)  | 0.27    | 0.12        | 0.033 (0.062)  | 0.59    |
| 9   | 118174617         | rs7869550  | A           | 0.22         | -0.002 (0.049) | 0.97    | 0.21        | -0.002 (0.051) | 0.66    |
| 9   | 132453905         | rs7466269  | A           | 0.45         | 0.043 (0.039)  | 0.27    | 0.47        | -0.029 (0.041) | 0.47    |
| 12  | 64644614          | rs1042725  | C           | 0.48         | 0.091 (0.041)  | 0.026   | 0.47        | 0.061 (0.041)  | 0.14    |
| 14  | 36069800          | rs17104630 | A           | 0.1          | 0.037 (0.068)  | 0.59    | 0.11        | 0.06 (0.067)   | 0.37    |
| 14  | 91477446          | rs3783937  | C           | 0.23         | 0.049 (0.047)  | 0.30    | 0.25        | 0.053 (0.046)  | 0.24    |
| 15  | 77391837          | rs11858942 | A           | 0.33         | 0.001 (0.044)  | 0.97    | 0.33        | 0.039 (0.045)  | 0.38    |
| 15  | 82077496          | rs2562784  | FAILED      |              |                |         |             |                |         |
| 16  | 615681            | rs763014   | C           | 0.48         | 0.077 (0.04)   | 0.056   | 0.49        | 0.013 (0.04)   | 0.75    |
| 16  | 2225358           | rs26840    | C           | 0.45         | 0.053 (0.043)  | 0.22    | 0.45        | -0.009 (0.042) | 0.83    |
| 17  | 51785154          | rs12449568 | C           | 0.49         | -0.032 (0.04)  | 0.23    | 0.49        | -0.016 (0.042) | 0.70    |
| 19  | 2121954           | rs12986413 | A           | 0.46         | -0.124 (0.042) | 0.44    | 0.45        | -0.071 (0.041) | 0.0023  |
| 20  | 5034939           | rs6116651  | A           | 0.07         | 0.101 (0.078)  | 0.20    | 0.07        | 0.082 (0.079)  | 0.30    |
| 20  | 33370575          | rs6060369  | T           | 0.45         | -0.103 (0.04)  | 0.0090  | 0.46        | -0.071 (0.041) | 0.084   |

**Supplementary Table 7. Height information and association results from all cohorts for the 12 SNPs with combined P-values <5x10<sup>-7</sup> (see Table 1)**

| Chr<br>(position) | SNP      | Study                                      | Imputation<br>(rsq_hat) | MAF<br>(allele) | Gender | Sample<br>size | Mean height in cm (95% c.i.) by genotype |                      |                      | Variance<br>explained | Per G-<br>allele effect<br>size (s.e.) <sup>a</sup> | Hetero-<br>geneity <i>I</i> <sup>2</sup><br>(P-value) | P-value                 |                       |
|-------------------|----------|--------------------------------------------|-------------------------|-----------------|--------|----------------|------------------------------------------|----------------------|----------------------|-----------------------|-----------------------------------------------------|-------------------------------------------------------|-------------------------|-----------------------|
|                   |          |                                            |                         |                 |        |                | AA                                       | AG                   | GG                   |                       |                                                     |                                                       |                         |                       |
| 3<br>(142588260)  | rs724016 | <b>A) GWA</b>                              |                         |                 |        |                |                                          |                      |                      |                       |                                                     |                                                       |                         |                       |
|                   |          | DGI CTRL                                   |                         | 0.48 (A)        | Male   | 709            | 175.0 (174.0, 175.9)                     | 175.7 (175.1, 176.4) | 175.8 (175.0, 176.7) | 0.002                 | 0.062<br>(0.042)                                    |                                                       | 0.008                   |                       |
|                   |          |                                            | Imputed (0.996)         |                 | Female | 758            | 162.1 (161.2, 162.9)                     | 162.3 (161.7, 162.9) | 163.2 (162.4, 164.1) |                       |                                                     |                                                       |                         |                       |
|                   |          | DGI T2D                                    |                         | 0.50 (A)        | Male   | 768            | 174.2 (173.3, 175.0)                     | 174.4 (173.8, 175.0) | 174.2 (173.2, 175.1) | 0.0001                | 0.017<br>(0.039)                                    |                                                       | 0.58                    |                       |
|                   |          |                                            |                         |                 | Female | 743            | 160.5 (159.7, 161.4)                     | 160.9 (160.3, 161.5) | 161.2 (160.3, 162.1) |                       |                                                     |                                                       |                         |                       |
|                   |          | FUSION<br>CTRL                             |                         | 0.45(G)         | Male   | 640            | 173.9 (173.4, 174.4)                     | 174.2 (173.6, 174.7) | 174.7 (174.1, 175.2) | 0.00245               | 0.07<br>(0.04)                                      |                                                       | 0.082                   |                       |
|                   |          |                                            | Imputed(0.969)          |                 | Female | 647            | 160.4 (159.9, 160.8)                     | 160.7 (160.2, 161.2) | 161.1 (160.6, 161.5) |                       |                                                     |                                                       |                         |                       |
|                   |          | FUSION<br>T2D                              |                         | 0.47(G)         | Male   | 617            | 159.1 (158.6, 159.5)                     | 159.4 (158.9, 159.9) | 160.4 (159.9, 160.8) | 0.0045                | 0.095<br>(0.043)                                    |                                                       | 0.029                   |                       |
|                   |          |                                            |                         |                 | Female | 467            | 171.9 (166.5, 177.4)                     | 173.2 (168.6, 177.7) | 172.4 (165.3, 179.4) |                       |                                                     |                                                       |                         |                       |
|                   |          | KORA S3                                    | Imputed (0.99)          | 0.42 (G)        | Male   | 813            | 173.0 (172.2, 173.8)                     | 174.0 (173.4, 174.7) | 174.1 (173.1, 175.2) | Not<br>available      | 0.115<br>(0.036)                                    |                                                       | 0.0014                  |                       |
|                   |          |                                            |                         |                 | Female | 830            | 160.5 (159.8, 161.1)                     | 161.3 (160.7, 161.9) | 161.6 (160.6, 162.5) |                       |                                                     |                                                       |                         |                       |
|                   |          | NHS                                        | Imputed (0.994)         | 0.44 (G)        | Male   | 2,286          | Not applicable                           |                      |                      | 0.0039                | 0.089<br>(0.029)                                    |                                                       | 0.002                   |                       |
|                   |          |                                            |                         |                 | Female |                | 163.4 (163.2, 163.6)                     | 164.1 (163.9, 164.3) | 164.6 (164.3, 164.9) |                       |                                                     |                                                       |                         |                       |
|                   |          | PLCO                                       | Imputed (0.998)         | 0.43 (G)        | Male   | 2244           | 178.2 (177.7, 178.7)                     | 178.3 (177.9, 178.7) | 178.9 (178.2, 179.6) | 0.001                 | 0.046<br>(0.03)                                     |                                                       | 0.13                    |                       |
|                   |          |                                            |                         |                 | Female |                | Not applicable                           |                      |                      |                       |                                                     |                                                       |                         |                       |
|                   |          | SardiNIA                                   | Genotyped               | 0.311 (G)       | Male   | 1,883          | 158.1 (157.2, 159.0)                     | 158.0 (156.0, 159.1) | 155.3 (153.5, 157.1) | 0.0054                | 0.075<br>(0.017)                                    |                                                       | 5.96 x 10 <sup>-5</sup> |                       |
|                   |          |                                            |                         |                 | Female | 2,415          | 157.8 (156.9, 158.7)                     | 158.3 (157.4, 159.2) | 157.2 (155.3, 159.1) |                       |                                                     |                                                       |                         |                       |
|                   |          | <b>Combined GWA (N=15,821)<sup>b</sup></b> |                         |                 |        |                |                                          |                      |                      |                       |                                                     |                                                       | 0% (0.79)               | 5.0x10 <sup>-12</sup> |
|                   |          | <b>B) Follow-up studies</b>                |                         |                 |        |                |                                          |                      |                      |                       |                                                     |                                                       |                         |                       |
|                   |          | USHT tall-<br>short                        | Genotyped               | 0.42 (G)        | Male   | 1094           |                                          | Not applicable       |                      |                       | OR=1.4<br>[1.2-1.6]                                 |                                                       | 7.8x10 <sup>-8</sup>    |                       |
|                   |          |                                            |                         |                 | Female | 1095           |                                          |                      |                      |                       |                                                     |                                                       |                         |                       |
|                   |          | FINRISK97                                  | Genotyped               | 0.44 (G)        | Male   | 3933           | 174.8 (174.4, 175.2)                     | 175.4 (175.1, 175.7) | 175.8 (175.3, 176.2) | 0.004                 | 0.087<br>(0.016)                                    |                                                       | 4.3x10 <sup>-8</sup>    |                       |
|                   |          |                                            |                         |                 | Female | 3869           | 161.8 (161.4, 1162.1)                    | 162.6 (162.3, 162.8) | 162.9 (162.4, 163.4) |                       |                                                     |                                                       |                         |                       |
|                   |          | FUSION2<br>CTRL                            | Genotyped               | 0.45(G)         | Male   | 745            | 173.7 (173.3, 174.1)                     | 174.8 (174.3, 175.2) | 175 (174.5, 175.4)   | 0.00149               | 0.055<br>(0.04)                                     |                                                       | 0.17                    |                       |
|                   |          |                                            |                         |                 | Female | 470            | 160.6 (160, 161.2)                       | 160.4 (159.8, 161)   | 160.6 (160.1, 161.2) |                       |                                                     |                                                       |                         |                       |
|                   |          | FUSION2<br>T2D                             | Genotyped               | 0.45(G)         | Male   | 693            | 174.6 (174.1, 175.1)                     | 174.9 (174.4, 175.4) | 175.2 (174.7, 175.7) | 0.00002               | 0.006<br>(0.04)                                     |                                                       | 0.88                    |                       |
|                   |          |                                            |                         |                 | Female | 482            | 160.2 (159.7, 160.7)                     | 160.1 (159.6, 160.6) | 160.2 (159.7, 160.8) |                       |                                                     |                                                       |                         |                       |

|                                                    |           |          |        |      |                      |                      |                      |               |               |                       |
|----------------------------------------------------|-----------|----------|--------|------|----------------------|----------------------|----------------------|---------------|---------------|-----------------------|
| KORA S4                                            | Genotyped | 0.43 (G) | Male   | 2026 | 174.5 (174.0, 175.0) | 174.8 (174.3, 175.2) | 175.6( 174.9, 176.4) | Not available | 0.024 (0.011) | 0.021                 |
|                                                    |           |          | Female | 2077 | 161.3 (160.8, 161.8) | 162.4 (162.0, 162.8) | 162.0 (161.4, 162.7) |               |               |                       |
| PPP                                                | Genotyped | 0.50 (A) | Male   | 1611 | 176.5 (175.9, 177.2) | 177.2 (176.7, 177.7) | 177.2 (176.6, 177.9) | 0.003         | 0.083 (0.024) | 0.00059               |
|                                                    |           |          | Female | 1791 | 163.1 (162.5, 163.7) | 164.1 (163.7, 164.5) | 164.2 (163.7, 164.8) |               |               |                       |
| Combined follow-up studies (N=17,697) <sup>b</sup> |           |          |        |      |                      |                      |                      |               | 71% (0.005)   | 2.5x10 <sup>-11</sup> |
| All studies (N=33.,518) <sup>b</sup>               |           |          |        |      |                      |                      |                      |               |               | 8.3x10 <sup>-22</sup> |

<sup>a</sup>Effect size and standard error are expressed in s.d. units. For the DGI GWAS, only the unrelated component of the study (N=2,448) was used to estimate the effect size. Combined effect sizes for the 'Follow-up studies' or 'All studies' did not use data from the case-control tall-short USHT panel. <sup>b</sup>Combined P-values were calculated using a weighted Z-score method. Combined effect sizes were calculated using the inverse variance method, assuming a fixed effect.

**Supplementary Table 7 (continued)**

| Chr<br>(position)    | SNP       | Study                                | Imputation<br>(rsq_hat) | MAF<br>(allele) | Gender | Sample<br>size | Mean height in cm (95% c.i.) by genotype |                         |                         | Variance<br>explained | Per G-<br>allele effect<br>size (s.e.) <sup>a</sup> | Hetero-<br>geneity <i>I</i> <sup>2</sup><br>(P-value) | P-value   |                      |
|----------------------|-----------|--------------------------------------|-------------------------|-----------------|--------|----------------|------------------------------------------|-------------------------|-------------------------|-----------------------|-----------------------------------------------------|-------------------------------------------------------|-----------|----------------------|
|                      |           |                                      |                         |                 |        |                | AA                                       | AG                      | GG                      |                       |                                                     |                                                       |           |                      |
| 4<br>(14586947<br>1) | rs1492820 | A) GWA                               |                         |                 |        |                |                                          |                         |                         |                       |                                                     |                                                       |           |                      |
|                      |           | DGI CTRL                             | Imputed (0.975)         | 0.43 (G)        | Male   | 709            | 176.1 (175.2,<br>176.9)                  | 175.6 (175.0,<br>176.2) | 174.5 (173.4,<br>175.6) | 0.004                 | -0.144<br>(0.043)                                   | 0.010                                                 |           |                      |
|                      |           |                                      |                         |                 | Female | 758            | 163.0 (162.2,<br>163.8)                  | 162.2 (161.6,<br>162.8) | 162.5 (161.5,<br>163.5) |                       |                                                     |                                                       |           |                      |
|                      |           | DGI T2D                              | Imputed (0.975)         | 0.43 (G)        | Male   | 768            | 174.4 (173.6,<br>175.2)                  | 174.4 (173.7,<br>175.0) | 173.9 (172.9,<br>174.9) | 0.001                 | -0.067<br>(0.04)                                    | 0.12                                                  |           |                      |
|                      |           |                                      |                         |                 | Female | 743            | 161.7 (160.9,<br>162.5)                  | 160.3 (159.7,<br>160.9) | 161.0 (160.0,<br>162.0) |                       |                                                     |                                                       |           |                      |
|                      |           | FUSION<br>CTRL                       | Imputed(0.978)          | 0.41(G)         | Male   | 640            | 173.3 (172.8,<br>173.9)                  | 174.6 (174,<br>175.1)   | 174.1 (173.6,<br>174.6) | 0.0027                | -0.074<br>(0.04)                                    | 0.066                                                 |           |                      |
|                      |           |                                      |                         |                 | Female | 647            | 159.9 (159.4,<br>160.3)                  | 160.8 (160.3,<br>161.3) | 160.9 (160.4,<br>161.3) |                       |                                                     |                                                       |           |                      |
|                      |           | FUSION<br>T2D                        | Imputed(0.978)          | 0.41(G)         | Male   | 617            | 172.7 (172.3,<br>173.2)                  | 173.4 (172.9,<br>173.9) | 173.2 (172.7,<br>173.6) | 0.00001               | -0.004<br>(0.045)                                   | 0.93                                                  |           |                      |
|                      |           |                                      |                         |                 | Female | 467            | 159.4 (159,<br>159.9)                    | 159.7 (159.2,<br>160.2) | 159.3 (158.8,<br>159.8) |                       |                                                     |                                                       |           |                      |
|                      |           | KORA S3                              | Imputed (0.99)          | 0.44 (G)        | Male   | 813            | 174.6 (173.8,<br>175.4)                  | 173.2 (172.6,<br>173.9) | 173.5 (172.4,<br>174.5) | Not<br>available      | -0.096<br>(0.036)                                   | 0.0082                                                |           |                      |
|                      |           |                                      |                         |                 | Female | 830            | 161.6 (160.8,<br>162.3)                  | 160.8 (160.2,<br>161.4) | 161 (160.1,<br>161.8)   |                       |                                                     |                                                       |           |                      |
|                      |           | NHS                                  | Imputed (0.983)         | 0.46 (G)        | Male   | 2,286          | Not applicable                           |                         |                         | 0.0029                | -0.080<br>(0.029)                                   | 0.007                                                 |           |                      |
|                      |           |                                      |                         |                 | Female |                | 164.6 (164.4,<br>164.8)                  | 163.7 (163.5,<br>163.9) | 163.7 (163.4,<br>164.0) |                       |                                                     |                                                       |           |                      |
|                      |           | PLCO                                 | Imputed (0.990)         | 0.44 (G)        | Male   | 2244           | 178.8 (178.3,<br>179.3)                  | 178.3 (177.9,<br>178.7) | 177.9 (177.3,<br>178.5) | 0.002                 | -0.065<br>(0.029)                                   | 0.03                                                  |           |                      |
|                      |           |                                      |                         |                 | Female | Not applicable |                                          |                         |                         |                       |                                                     |                                                       |           |                      |
|                      |           | SardiNIA                             | Imputed (0.970)         | 0.373 (A)       | Male   | 1,883          | 158.2<br>(156.2,160.1)                   | 157.3<br>(156.3,158.2)  | 158.4<br>(157.3,159.4)  | 0.0024                | -0.047<br>(0.22)                                    | 0.0582                                                |           |                      |
|                      |           |                                      |                         |                 | Female | 2,415          | 158.1 (156.6,<br>159.6)                  | 158.1 (157.2,<br>159.1) | 157.8 (156.8,<br>158.7) |                       |                                                     |                                                       |           |                      |
|                      |           | Combined GWA (N=15,821) <sup>b</sup> |                         |                 |        |                |                                          |                         |                         |                       |                                                     |                                                       | 0% (0.58) | 3.6x10 <sup>-8</sup> |
|                      |           | B) Follow-up studies                 |                         |                 |        |                |                                          |                         |                         |                       |                                                     |                                                       |           |                      |
|                      |           | USHT tall-<br>short                  | Genotyped               | 0.47 (G)        | Male   | 1,094          | Not applicable                           |                         |                         | OR=0.8<br>[0.7-0.9]   | 0.0015                                              |                                                       |           |                      |
|                      |           |                                      |                         |                 | Female | 1,095          |                                          |                         |                         |                       |                                                     |                                                       |           |                      |
|                      |           | FINRISK97                            | Genotyped               | 0.41 (G)        | Male   | 3839           | 175.4 (175.0<br>175.8)                   | 175.2 (174.9,<br>175.5) | 175.3 (174.7,<br>175.8) | 0.0006                | -0.034<br>(0.016)                                   | 0.035                                                 |           |                      |
|                      |           |                                      |                         |                 | Female | 3859           | 162.5 (162.1,<br>162.8)                  | 162.4 (162.1,<br>162.7) | 162.2 (161.7,<br>162.6) |                       |                                                     |                                                       |           |                      |
|                      |           | FUSION2<br>CTRL                      | Genotyped               | 0.41(G)         | Male   | 743            | 174.7 (174.2,<br>175.1)                  | 174.4 (174,<br>174.9)   | 174.2 (173.8,<br>174.6) | 0.0013                | -0.051<br>(0.041)                                   | 0.21                                                  |           |                      |
|                      |           |                                      |                         |                 | Female | 469            | 160.5 (159.9,<br>161.1)                  | 160.6 (160,<br>161.1)   | 160.5 (159.9,<br>161)   |                       |                                                     |                                                       |           |                      |
|                      |           | FUSION2<br>T2D                       | Genotyped               | 0.41(G)         | Male   | 693            | 174.8 (174.3,<br>175.3)                  | 174.9 (174.4,<br>175.4) | 174.8 (174.3,<br>175.4) | 0.00031               | 0.025<br>(0.41)                                     | 0.54                                                  |           |                      |
|                      |           |                                      |                         |                 | Female | 482            | 160.2 (159.6,<br>160.8)                  | 159.9 (159.4,<br>160.4) | 160.7 (160.3,<br>161.1) |                       |                                                     |                                                       |           |                      |

|                                                          |           |          |        |      |               |               |               |           |         |                       |
|----------------------------------------------------------|-----------|----------|--------|------|---------------|---------------|---------------|-----------|---------|-----------------------|
|                                                          |           |          |        |      | 160.7)        | 160.5)        | 161.2)        |           |         |                       |
|                                                          |           |          | Male   | 1611 | 177.2 (176.6, | 177.3 (176.8, | 176.2 (175.6, |           |         |                       |
| PPP                                                      | Genotyped | 0.44 (G) |        |      | 177.8)        | 177.8)        | 176.9)        |           |         |                       |
|                                                          |           |          | Female | 1791 | 164.1 (163.6, | 163.7 (163.3, | 164.1 (163.5, | 0.001     | -0.048  | 0.050                 |
|                                                          |           |          |        |      | 164.6)        | 164.1)        | 164.8)        |           | (0.025) |                       |
|                                                          |           |          | Male   | 2015 | 175.2 (174.6, | 174.9 (174.4, | 174.2 (173.5, |           |         |                       |
| KORA S4                                                  | Genotyped | 0.44 (G) |        |      | 175.8)        | 175.3)        | 174.9)        | Not       | -0.030  |                       |
|                                                          |           |          | Female | 2066 | 162.3 (161.8, | 161.8 (161.4, | 161.8 (161.2, | available | (0.011) | 0.0045                |
|                                                          |           |          |        |      | 162.9)        | 162.2)        | 162.4)        |           |         |                       |
| <b>Combined follow-up studies (N=17,697)<sup>b</sup></b> |           |          |        |      |               |               |               |           | 0% (1)  | 3.9x10 <sup>-5</sup>  |
| <b>All studies (N=33,518)<sup>b</sup></b>                |           |          |        |      |               |               |               |           |         | 1.2x10 <sup>-11</sup> |

<sup>a</sup>Effect size and standard error are expressed in s.d. units. For the DGI GWAS, only the unrelated component of the study (N=2,448) was used to estimate the effect size. Combined effect sizes for the 'Follow-up studies' or 'All studies' did not use data from the case-control tall-short USHT panel. <sup>b</sup>Combined P-values were calculated using a weighted Z-score method. Combined effect sizes were calculated using the inverse variance method, assuming a fixed effect.

Supplementary Table 7 (continued)

| Chr<br>(position)   | SNP        | Study                                | Imputation<br>(rsq_hat) | MAF<br>(allele) | Gender | Sample<br>size | Mean height in cm (95% c.i.) by genotype |                      |                      | Variance<br>explained | Per G-<br>allele effect<br>size (s.e.) <sup>a</sup> | Hetero-<br>geneity <i>I</i> <sup>2</sup><br>(P-value) | P-value    |                      |
|---------------------|------------|--------------------------------------|-------------------------|-----------------|--------|----------------|------------------------------------------|----------------------|----------------------|-----------------------|-----------------------------------------------------|-------------------------------------------------------|------------|----------------------|
|                     |            |                                      |                         |                 |        |                | AA                                       | AG                   | GG                   |                       |                                                     |                                                       |            |                      |
| 6<br>(26341366<br>) | rs10946808 | A) GWA                               |                         |                 |        |                |                                          |                      |                      |                       |                                                     |                                                       |            |                      |
|                     |            | DGI CTRL                             | Imputed (0.872)         | 0.33 (G)        | Male   | 709            | 175.5 (174.8, 176.2)                     | 175.9 (175.2, 176.5) | 174.6 (173.1, 176.1) | 0.0002                | -0.035<br>(0.049)                                   | 0.92                                                  |            |                      |
|                     |            |                                      |                         |                 | Female | 758            | 162.9 (162.3, 163.5)                     | 162.1 (161.4, 162.7) | 162.4 (161.1, 163.7) |                       |                                                     |                                                       |            |                      |
|                     |            | DGI T2D                              |                         | 0.33 (G)        | Male   | 768            | 174.8 (174.2, 175.4)                     | 174.2 (173.5, 175.0) | 172.4 (171.3, 173.5) | 0.007                 | -0.179<br>(0.045)                                   | 4.8x10 <sup>-5</sup>                                  |            |                      |
|                     |            |                                      |                         |                 | Female | 743            | 161.7 (161.0, 162.3)                     | 160.5 (159.9, 161.2) | 159.4 (158.1, 160.7) |                       |                                                     |                                                       |            |                      |
|                     |            | FUSION CTRL                          | Genotyped               | 0.43 (G)        | Male   | 640            | 174.6 (174.1, 175.1)                     | 174 (173.5, 174.5)   | 173.9 (173.4, 174.5) | 0.0006                | -0.034<br>(0.03)                                    | 0.38                                                  |            |                      |
|                     |            |                                      |                         |                 | Female | 647            | 160.9 (160.4, 161.3)                     | 160.6 (160.1, 161.1) | 160.5 (160, 161.1)   |                       |                                                     |                                                       |            |                      |
|                     |            | FUSION T2D                           |                         | 0.42 (G)        | Male   | 617            | 173.9 (173.4, 174.4)                     | 172.9 (172.4, 173.3) | 172.9 (172.5, 173.4) | 0.004                 | -0.094<br>(0.043)                                   | 0.0296                                                |            |                      |
|                     |            |                                      |                         |                 | Female | 467            | 160.3 (159.8, 160.8)                     | 159.2 (158.7, 159.7) | 159.1 (158.5, 159.6) |                       |                                                     |                                                       |            |                      |
|                     |            | KORA S3                              | Imputed (0.83)          | 0.29 (G)        | Male   | 813            | 173.7 (173.1, 174.4)                     | 174.0 (173.3, 174.7) | 172.1 (170.7, 173.6) | Not available         | -0.085<br>(0.044)                                   | 0.056                                                 |            |                      |
|                     |            |                                      |                         |                 | Female | 830            | 161.3 (160.7, 161.9)                     | 161.1 (160.4, 161.7) | 159.3 (157.6, 161.0) |                       |                                                     |                                                       |            |                      |
|                     |            | NHS                                  | Imputed (1.00)          | 0.30 (G)        | Male   | 2,286          | Not applicable                           |                      |                      | 0.0024                | -0.075<br>(0.032)                                   | 0.019                                                 |            |                      |
|                     |            |                                      |                         |                 | Female |                | 164.3 (164.1, 164.5)                     | 163.8 (163.6, 164.0) | 162.9 (162.0, 163.8) |                       |                                                     |                                                       |            |                      |
|                     |            | PLCO                                 | Genotyped               | 0.29 (G)        | Male   | 2244           | 178.6 (178.3, 179.0)                     | 178.2 (177.7, 178.6) | 177.6 (176.7, 178.6) | 0.002                 | -0.063<br>(0.032)                                   | 0.05                                                  |            |                      |
|                     |            |                                      |                         |                 | Female | Not applicable |                                          |                      |                      |                       |                                                     |                                                       |            |                      |
|                     |            | SardiNIA                             | Imputed( 0.801)         | 0.244 (G)       | Male   | 1,883          | 157.6 (156.7, 158.5)                     | 158.1 (157.0, 159.2) | 156.8 (154.5, 159.1) | 0.0038                | -0.068<br>(0.026)                                   | 0.0172                                                |            |                      |
|                     |            |                                      |                         |                 | Female | 2,415          | 157.9 (157.2, 158.7)                     | 158.6 (157.6, 159.6) | 154.2 (151.5, 156.8) |                       |                                                     |                                                       |            |                      |
|                     |            | Combined GWA (N=15,821) <sup>b</sup> |                         |                 |        |                |                                          |                      |                      |                       |                                                     |                                                       | 40% (0.15) | 3.3x10 <sup>-8</sup> |
|                     |            | B) Follow-up studies                 |                         |                 |        |                |                                          |                      |                      |                       |                                                     |                                                       |            |                      |
|                     |            | USHT tall-short                      | Genotyped               | 0.31 (G)        | Male   | 1,094          | Not applicable                           |                      |                      | OR=0.7<br>[0.7-0.8]   | 3.4x10 <sup>-8</sup>                                |                                                       |            |                      |
|                     |            |                                      |                         |                 | Female | 1,095          |                                          |                      |                      |                       |                                                     |                                                       |            |                      |
|                     |            | FINRISK97                            | Genotyped               | 0.43 (G)        | Male   | 3932           | 175.6 (175.3, 176.0)                     | 175.2 (174.9, 175.6) | 174.8 (174.3, 175.3) | 0.002                 | -0.065<br>(0.016)                                   | 4.9x10 <sup>-5</sup>                                  |            |                      |
|                     |            |                                      |                         |                 | Female | 3876           | 163.0 (162.6, 163.4)                     | 162.1 (161.8, 162.4) | 162.1 (161.6, 162.5) |                       |                                                     |                                                       |            |                      |
|                     |            | FUSION2 CTRL                         |                         | 0.46(G)         | Male   | 745            | 175.3 (174.9, 175.8)                     | 174.2 (173.8, 174.7) | 174.1 (173.6, 174.5) | 0.0075                | -0.123<br>(0.04)                                    | 0.0022                                                |            |                      |
|                     |            |                                      |                         |                 | Female | 473            | 160.9 (160.3, 161.5)                     | 160.7 (160.2, 161.3) | 159.5 (158.9, 160)   |                       |                                                     |                                                       |            |                      |
|                     |            | FUSION2 T2D                          | Genotyped               | 0.43(G)         | Male   | 697            | 175.9 (175.4, 176.4)                     | 174.2 (173.7, 174.7) | 174.7 (174.2, 175.2) | 0.00367               | -0.086<br>(0.041)                                   | 0.035                                                 |            |                      |
|                     |            |                                      |                         |                 | Female | 477            | 161 (160.4, 161.5)                       | 159.6 (159.1, 160.1) | 160.1 (159.6, 160.7) |                       |                                                     |                                                       |            |                      |

|                                                    |           |          |        |      |                      |                      |                      |               |                |                       |
|----------------------------------------------------|-----------|----------|--------|------|----------------------|----------------------|----------------------|---------------|----------------|-----------------------|
| PPP                                                | Genotyped | 0.35 (G) | Male   | 1611 | 177.6 (177.1, 178.1) | 176.6 (176.1, 177.1) | 176.8 (175.8, 177.7) | 0.003         | -0.078 (0.025) | 0.0022                |
|                                                    |           |          | Female | 1791 | 164.4 (163.9, 164.8) | 163.5 (163.0, 163.9) | 163.9 (163.0, 164.7) |               |                |                       |
| KORA S4                                            | Genotyped | 0.29 (G) | Male   | 2027 | 175.2 (174.8, 175.6) | 174.6 (174.2, 175.1) | 173.8 (172.9, 174.8) | Not available | -0.024 (0.012) | 0.035                 |
|                                                    |           |          | Female | 2077 | 162.0 (161.6, 162.4) | 162.1 (161.7, 162.6) | 161.1 (160.2, 162.1) |               |                |                       |
| Combined follow-up studies (N=17,697) <sup>b</sup> |           |          |        |      |                      |                      |                      |               | 63% (0.03)     | 1.9x10 <sup>-10</sup> |
| All studies (N=33,518) <sup>b</sup>                |           |          |        |      |                      |                      |                      |               |                | 3.8x10 <sup>-17</sup> |

<sup>a</sup>Effect size and standard error are expressed in s.d. units. For the DGI GWAS, only the unrelated component of the study (N=2,448) was used to estimate the effect size. Combined effect sizes for the 'Follow-up studies' or 'All studies' did not use data from the case-control tall-short USHT panel. <sup>b</sup>Combined P-values were calculated using a weighted Z-score method. Combined effect sizes were calculated using the inverse variance method, assuming a fixed effect.

Supplementary Table 7 (continued)

| Chr<br>(position)    | SNP      | Study                                | Imputation<br>(rsq_hat) | MAF<br>(allele) | Gender   | Sample<br>size | Mean height in cm (95% c.i.) by genotype |                       |                      | Variance<br>explained | Per A-<br>allele effect<br>size (s.e.) <sup>a</sup> | Hetero-<br>geneity <i>I</i> <sup>2</sup><br>(P-value) | P-value   |                      |  |
|----------------------|----------|--------------------------------------|-------------------------|-----------------|----------|----------------|------------------------------------------|-----------------------|----------------------|-----------------------|-----------------------------------------------------|-------------------------------------------------------|-----------|----------------------|--|
|                      |          |                                      |                         |                 |          |                | AA                                       | AC                    | CC                   |                       |                                                     |                                                       |           |                      |  |
| 6<br>(10551435<br>5) | rs314277 | A) GWA                               |                         |                 |          |                |                                          |                       |                      |                       |                                                     |                                                       |           |                      |  |
|                      |          | DGI CTRL                             | Imputed (0.599)         | 0.13 (A)        | Male     | 709            | 174.9 (170.6, 179.3)                     | 176.1 (175.2, 177.0)  | 175.4 (174.9, 176.0) | 0.0009                | 0.052 (0.079)                                       |                                                       | 0.24      |                      |  |
|                      |          |                                      |                         |                 | Female   | 758            | 164.0 (161.5, 166.6)                     | 162.7 (161.8, 163.7)  | 162.4 (161.9, 162.9) |                       |                                                     |                                                       |           |                      |  |
|                      |          | DGI T2D                              |                         | Genotyped       | 0.13 (A) | Male           | 768                                      | 174.7 (172.4, 177.0)  | 174.3 (173.3, 175.2) | 174.3 (173.8, 174.8)  | 0.001                                               | 0.096 (0.074)                                         |           | 0.10                 |  |
|                      |          |                                      |                         |                 |          | Female         | 743                                      | 160.4 (154.8, 166.0)  | 161.3 (160.5, 162.2) | 160.8 (160.2, 161.3)  |                                                     |                                                       |           |                      |  |
|                      |          | FUSION CTRL                          | Genotyped               |                 | 0.16 (A) | Male           | 640                                      | 176.1 (175.7, 176.6)  | 174.3 (173.8, 174.8) | 174.1 (173.5, 174.6)  | 0.0028                                              | 0.104 (0.055)                                         |           | 0.059                |  |
|                      |          |                                      |                         |                 |          | Female         | 647                                      | 161.3 (160.9, 161.7)  | 161.5 (161.1, 162)   | 160.4 (159.9, 160.8)  |                                                     |                                                       |           |                      |  |
|                      |          | FUSION T2D                           |                         | Genotyped       | 0.14 (A) | Male           | 617                                      | 174.3 (173.8, 174.8)  | 174.2 (173.7, 174.7) | 172.9 (172.4, 173.4)  | 0.0093                                              | 0.192 (0.061)                                         |           | 0.0016               |  |
|                      |          |                                      |                         |                 |          | Female         | 467                                      | 162.6 (162.3, 162.9)  | 159.8 (159.3, 160.4) | 159.4 (158.8, 159.9)  |                                                     |                                                       |           |                      |  |
|                      |          | KORA S3                              | Imputed (0.598)         |                 | 0.11 (A) | Male           | 813                                      | 173.5 (160.7, 186.3)  | 174.0 (173.1, 174.9) | 173.6 (173.1, 174.1 ) | Not available                                       | 0.177 (0.073)                                         |           | 0.015                |  |
|                      |          |                                      |                         |                 |          | Female         | 830                                      | 158.7 (148.6, 168.8 ) | 162.1 (161.2, 163.0) | 160.8 (160.3, 161.3)  |                                                     |                                                       |           |                      |  |
|                      |          | NHS                                  |                         | Imputed (1.00)  | 0.14 (A) | Male           | 2,286                                    | Not applicable        |                      |                       | 0.0024                                              | 0.100 (0.042)                                         |           | 0.017                |  |
|                      |          |                                      |                         |                 |          | Female         |                                          | 161.3 (157.6, 165.0)  | 164.5 (164.2, 164.8) | 163.9 (163.8, 164.0)  |                                                     |                                                       |           |                      |  |
|                      |          | PLCO                                 | Genotyped               |                 | 0.15 (A) | Male           | 2243                                     | 178.3 (176.4, 180.1)  | 178.7 (178.2, 179.3) | 178.2 (177.9, 178.6)  | 0.001                                               | 0.062 (0.041)                                         |           | 0.13                 |  |
|                      |          |                                      |                         |                 |          | Female         | Not applicable                           |                       |                      |                       |                                                     |                                                       |           |                      |  |
|                      |          | SardiNIA                             |                         | Imputed (0.614) | 0.09(A)  | Male           | 1,883                                    | 158.5 (147.7, 169.3)  | 157.2 (155.7, 158.8) | 157.9 (157.2, 158.6)  | 0.0024                                              | 0.079 (0.028)                                         |           | 0.0105               |  |
|                      |          |                                      |                         |                 |          | Female         | 2,415                                    | 168.5 (159.7, 177.3)  | 157.8 (156.5, 159.1) | 158.0 (157.3, 158.7)  |                                                     |                                                       |           |                      |  |
|                      |          | Combined GWA (N=15,821) <sup>b</sup> |                         |                 |          |                |                                          |                       |                      |                       |                                                     |                                                       | 0% (0.76) | 5.9x10 <sup>-9</sup> |  |
|                      |          | B) Follow-up studies                 |                         |                 |          |                |                                          |                       |                      |                       |                                                     |                                                       |           |                      |  |
|                      |          | USHT tall-short                      | Genotyped               | 0.14 (A)        | Male     | 1,094          | Not applicable                           |                       |                      |                       | OR=1.1 [0.9-1.3]                                    |                                                       | 0.26      |                      |  |
|                      |          |                                      |                         |                 | Female   | 1,095          |                                          |                       |                      |                       |                                                     |                                                       |           |                      |  |
|                      |          | FINRISK97                            | Genotyped               | 0.17 (A)        | Male     | 3935           | 175.3 (174.0, 176.6)                     | 175.2 (174.8, 175.6)  | 175.3 (175.1, 175.6) | 8x10 <sup>-5</sup>    | 0.018 (0.021)                                       |                                                       | 0.41      |                      |  |
|                      |          |                                      |                         |                 | Female   | 3875           | 163.8 (162.6, 165.0)                     | 162.2 (161.8, 162.6)  | 162.4 (162.2, 162.7) |                       |                                                     |                                                       |           |                      |  |
|                      |          | FUSION2 CTRL                         | Genotyped               | 0.14 (A)        | Male     | 745            | 173.1 (173, 173.3)                       | 174.9 (174.4, 175.4)  | 174.4 (174, 174.8)   | 0.0024                | 0.095 (0.061)                                       |                                                       | 0.12      |                      |  |
|                      |          |                                      |                         |                 | Female   | 473            | 164 (163.4, 164.7)                       | 161.3 (160.6, 161.9)  | 160.3 (159.7, 160.8) |                       |                                                     |                                                       |           |                      |  |
|                      |          | FUSION2 T2D                          |                         | Genotyped       | 0.17 (A) | Male           | 697                                      | 177.6 (177.2, 178.1)  | 175.6 (175.1, 176.1) | 174.5 (174, 175)      | 0.0014                                              | 0.073 (0.055)                                         |           | 0.18                 |  |
|                      |          |                                      |                         |                 |          | Female         | 477                                      | 157.6 (157.1, 158.2)  | 160 (159.5, 160.6)   | 160.4 (159.9, 161)    |                                                     |                                                       |           |                      |  |

<sup>a</sup>Effect size and standard error are expressed in s.d. units. For the DGI GWAS, only the unrelated component of the study (N=2,448) was used to estimate the effect size. Combined effect sizes for the ‘Follow-up studies’ or ‘All studies’ did not use data from the case-control tall-short USHT panel. <sup>b</sup>Combined P-values were calculated using a weighted Z-score method. Combined effect sizes were calculated using the inverse variance method, assuming a fixed effect.

Supplementary Table 7 (continued)

| Chr<br>(position)    | SNP       | Study                                | Imputation<br>(rsq_hat) | MAF<br>(allele) | Gender | Sample<br>size | Mean height in cm (95% c.i.) by genotype |                         |                         | Variance<br>explained | Per A-<br>allele effect<br>size (s.e.) <sup>a</sup> | Hetero-<br>geneity <i>I</i> <sup>2</sup><br>(P-value) | P-value              |           |                      |
|----------------------|-----------|--------------------------------------|-------------------------|-----------------|--------|----------------|------------------------------------------|-------------------------|-------------------------|-----------------------|-----------------------------------------------------|-------------------------------------------------------|----------------------|-----------|----------------------|
|                      |           |                                      |                         |                 |        |                | AA                                       | AG                      | GG                      |                       |                                                     |                                                       |                      |           |                      |
| 6<br>(14274557<br>0) | rs4896582 | A) GWA                               |                         |                 |        |                |                                          |                         |                         |                       |                                                     |                                                       |                      |           |                      |
|                      |           | DGI CTRL                             | Imputed (0.974)         | 0.26 (A)        | Male   | 709            | 174.7 (172.8,<br>176.7)                  | 175.1 (174.4,<br>175.8) | 176.0 (175.4,<br>176.6) | 0.0001                | -0.021<br>(0.048)                                   |                                                       | 0.067                |           |                      |
|                      |           |                                      |                         |                 | Female | 758            | 162.0 (160.6,<br>163.4)                  | 162.7 (162.0,<br>163.3) | 162.4 (161.9,<br>163.0) |                       |                                                     |                                                       |                      |           |                      |
|                      |           | DGI T2D                              | Imputed (0.974)         | 0.27 (A)        | Male   | 768            | 174.4 (172.7,<br>176.1)                  | 173.8 (173.1,<br>174.5) | 174.7 (174.0,<br>175.3) | 0.002                 | -0.058<br>(0.045)                                   |                                                       | 0.032                |           |                      |
|                      |           |                                      |                         |                 | Female | 743            | 161.2 (159.6,<br>162.7)                  | 160.4 (159.6,<br>161.1) | 161.3 (160.7,<br>161.9) |                       |                                                     |                                                       |                      |           |                      |
|                      |           | FUSION<br>CTRL                       | Imputed (0.978)         | 0.27 (A)        | Male   | 640            | 173 (172.5,<br>173.5)                    | 174.2 (173.7,<br>174.7) | 174.3 (173.8,<br>174.8) | 0.0033                | -0.092<br>(0.046)                                   |                                                       | 0.044                |           |                      |
|                      |           |                                      |                         |                 | Female | 647            | 159.9 (159.4,<br>160.3)                  | 160.3 (159.9,<br>160.8) | 161.1 (160.6,<br>161.5) |                       |                                                     |                                                       |                      |           |                      |
|                      |           | FUSION<br>T2D                        | Imputed (0.978)         | 0.26 (A)        | Male   | 617            | 171.1 (170.7,<br>171.6)                  | 173.2 (172.7,<br>173.6) | 173.6 (173.1,<br>174.1) | 0.0032                | -0.09<br>(0.049)                                    |                                                       | 0.063                |           |                      |
|                      |           |                                      |                         |                 | Female | 467            | 159.2 (158.6,<br>159.8)                  | 159.8 (159.3,<br>160.3) | 159.5 (159,<br>160)     |                       |                                                     |                                                       |                      |           |                      |
|                      |           | KORA S3                              | Imputed (0.96)          | 0.30 (A)        | Male   | 813            | 171.9 (170.4,<br>173.3)                  | 173.9 (173.2,<br>174.5) | 173.9 (173.2,<br>174.5) | Not<br>available      | -0.092<br>(0.039)                                   |                                                       | 0.019                |           |                      |
|                      |           |                                      |                         |                 | Female | 830            | 160.0 (158.7,<br>161.3)                  | 161.0 (160.4,<br>161.6) | 161.3 (160.7,<br>161.9) |                       |                                                     |                                                       |                      |           |                      |
|                      |           | NHS                                  | Imputed (0.978)         | 0.32 (A)        | Male   | 2,286          | Not applicable                           |                         |                         | 0.0015                | -0.056<br>(0.032)                                   |                                                       | 0.077                |           |                      |
|                      |           |                                      |                         |                 | Female |                | 163.7 (163.3,<br>164.1)                  | 163.8 (163.6,<br>164.0) | 164.2 (164.0,<br>164.4) |                       |                                                     |                                                       |                      |           |                      |
|                      |           | PLCO                                 | Imputed (0.981)         | 0.29 (A)        | Male   | 2244           | 177.5 (176.6,<br>178.4)                  | 178.4 (177.9,<br>178.8) | 178.5 (178.1,<br>178.9) | 0.002                 | -0.056<br>(0.032)                                   |                                                       | 0.08                 |           |                      |
|                      |           |                                      |                         |                 | Female | Not applicable |                                          |                         |                         |                       |                                                     |                                                       |                      |           |                      |
|                      |           | SardiNIA                             | Imputed (0.977)         | 0.366 (A)       | Male   | 1,883          | 157.7 (155.7,<br>159.7)                  | 157.2 (156.3,<br>158.1) | 158.5 (157.5,<br>159.6) | 0.0032                | -0.055<br>(0.022)                                   |                                                       | 0.0244               |           |                      |
|                      |           |                                      |                         |                 | Female | 2,415          | 158.6 (157.0,<br>160.2)                  | 157.9 (157.0,<br>158.8) | 157.8 (156.8,<br>158.7) |                       |                                                     |                                                       |                      |           |                      |
|                      |           | Combined GWA (N=15,821) <sup>b</sup> |                         |                 |        |                |                                          |                         |                         |                       |                                                     |                                                       |                      | 0% (0.96) | 3.2x10 <sup>-8</sup> |
|                      |           | B) Follow-up studies                 |                         |                 |        |                |                                          |                         |                         |                       |                                                     |                                                       |                      |           |                      |
|                      |           | USHT tall-<br>short                  | Genotyped               | 0.32 (A)        | Male   | 1,094          | Not applicable                           |                         |                         |                       | OR=0.8<br>[0.7-0.9]                                 |                                                       | 2.2x10 <sup>-5</sup> |           |                      |
|                      |           |                                      |                         |                 | Female | 1,095          |                                          |                         |                         |                       |                                                     |                                                       |                      |           |                      |
|                      |           | FINRISK97                            | Genotyped               | 0.29 (A)        | Male   | 3930           | 174.3 (173.6,<br>175.0)                  | 175.1 (174.7,<br>175.4) | 175.6 (175.3,<br>175.9) | 0.005                 | -0.105<br>(0.017)                                   |                                                       | 1.4x10 <sup>-9</sup> |           |                      |
|                      |           |                                      |                         |                 | Female | 3874           | 160.6 (160.0,<br>161.3)                  | 162.3 (162.0,<br>162.6) | 162.8 (162.5,<br>163.1) |                       |                                                     |                                                       |                      |           |                      |
|                      |           | FUSION2<br>CTRL                      | Genotyped               | 0.28 (A)        | Male   | 744            | 174.6 (174.2,<br>175)                    | 174 (173.6,<br>174.5)   | 174.9 (174.5,<br>175.4) | 0.0013                | -0.056<br>(0.045)                                   |                                                       | 0.21                 |           |                      |
|                      |           |                                      |                         |                 | Female | 472            | 159.8 (159.3,<br>160.3)                  | 160.4 (159.9,<br>161)   | 160.7 (160.1,<br>161.3) |                       |                                                     |                                                       |                      |           |                      |
|                      |           | FUSION2<br>T2D                       | Genotyped               | 0.27 (A)        | Male   | 692            | 174.3 (173.6,<br>174.9)                  | 174.2 (173.7,<br>174.6) | 175.4 (174.9,<br>175.9) | 0.0028                | -0.084<br>(0.04)                                    |                                                       | 0.080                |           |                      |
|                      |           |                                      |                         |                 | Female | 472            | 160 (159.5,<br>160.5)                    | 160.1 (159.6,<br>160.6) | 160.3 (159.8,<br>160.8) |                       |                                                     |                                                       |                      |           |                      |

|                                                          |           |          |        |      |                      |                      |                      |               |                |                       |
|----------------------------------------------------------|-----------|----------|--------|------|----------------------|----------------------|----------------------|---------------|----------------|-----------------------|
| KORA S4                                                  | Genotyped | 0.31 (A) | Male   | 2027 | 174.1 (173.0, 175.3) | 174.7 (174.3, 175.2) | 175.0 (174.6, 175.5) | Not available | -0.033 (0.012) | 0.0047                |
|                                                          |           |          | Female | 2079 | 160.7 (159.7, 161.7) | 161.9 (161.4, 162.3) | 162.3 (161.9, 162.7) |               |                |                       |
| <b>Combined follow-up studies (N=14,290)<sup>b</sup></b> |           |          |        |      |                      |                      |                      |               | 24% (0.29)     | 6.3x10 <sup>-12</sup> |
| <b>All studies (N=30,111)<sup>b</sup></b>                |           |          |        |      |                      |                      |                      |               |                | 2.4x10 <sup>-18</sup> |

<sup>a</sup>Effect size and standard error are expressed in s.d. units. For the DGI GWAS, only the unrelated component of the study (N=2,448) was used to estimate the effect size. Combined effect sizes for the 'Follow-up studies' or 'All studies' did not use data from the case-control tall-short USHT panel. <sup>b</sup>Combined P-values were calculated using a weighted Z-score method. Combined effect sizes were calculated using the inverse variance method, assuming a fixed effect.

Supplementary Table 7 (continued)

| Chr<br>(position)   | SNP       | Study                                | Imputation<br>(rsq_hat) | MAF<br>(allele) | Gender | Sample<br>size | Mean height in cm (95% c.i.) by genotype |                      |                      | Variance<br>explained | Per C-<br>allele effect<br>size (s.e.) <sup>a</sup> | Hetero-<br>geneity <i>I</i> <sup>2</sup><br>(P-value) | P-value |            |                      |
|---------------------|-----------|--------------------------------------|-------------------------|-----------------|--------|----------------|------------------------------------------|----------------------|----------------------|-----------------------|-----------------------------------------------------|-------------------------------------------------------|---------|------------|----------------------|
|                     |           |                                      |                         |                 |        |                | CC                                       | CT                   | TT                   |                       |                                                     |                                                       |         |            |                      |
| 7<br>(92094841<br>) | rs2040494 | A) GWA                               |                         |                 |        |                |                                          |                      |                      |                       |                                                     |                                                       |         |            |                      |
|                     |           | DGI CTRL                             | Imputed (0.976)         | 0.47 (C)        | Male   | 709            | 175.2 (174.3, 176.1)                     | 175.7 (175.1, 176.3) | 175.7 (174.8, 176.6) | 0.0003                | -0.026<br>(0.042)                                   |                                                       | 0.090   |            |                      |
|                     |           |                                      |                         |                 | Female | 758            | 162.3 (161.4, 163.2)                     | 162.4 (161.9, 163.0) | 162.8 (161.9, 163.6) |                       |                                                     |                                                       |         |            |                      |
|                     |           | DGI T2D                              | Imputed (0.976)         | 0.49 (C)        | Male   | 768            | 174.2 (173.3, 175.2)                     | 174.2 (173.5, 174.8) | 174.5 (173.7, 175.4) | 0.0005                | -0.033<br>(0.039)                                   |                                                       | 0.21    |            |                      |
|                     |           |                                      |                         |                 | Female | 743            | 160.4 (159.4, 161.5)                     | 160.9 (160.3, 161.5) | 161.3 (160.4, 162.2) |                       |                                                     |                                                       |         |            |                      |
|                     |           | FUSION<br>CTRL                       | Imputed (0.972)         | 0.49 (C)        | Male   | 640            | 173.7 (173.2, 174.1)                     | 174.1 (173.5, 174.6) | 174.8 (174.3, 175.3) | 0.00035               | -0.027<br>(0.04)                                    |                                                       | 0.51    |            |                      |
|                     |           |                                      |                         |                 | Female | 647            | 160.6 (160.1, 161)                       | 160.6 (160.2, 161.1) | 160.9 (160.4, 161.4) |                       |                                                     |                                                       |         |            |                      |
|                     |           | FUSION<br>T2D                        | Imputed (0.972)         | 0.47 (C)        | Male   | 617            | 172.5 (172, 173)                         | 174.1 (173.6, 174.5) | 172.2 (171.7, 172.7) | 0.00069               | 0.037<br>(0.044)                                    |                                                       | 0.39    |            |                      |
|                     |           |                                      |                         |                 | Female | 467            | 160 (159.5, 160.5)                       | 159.2 (158.7, 159.7) | 159.7 (159.1, 160.2) |                       |                                                     |                                                       |         |            |                      |
|                     |           | KORA S3                              | Imputed (0.972)         | 0.46 (C)        | Male   | 813            | 173.8 (172.7, 174.9)                     | 173.6 (172.9, 174.2) | 173.9 (173.1, 174.8) | Not<br>available      | 0<br>(0.036)                                        |                                                       | 1       |            |                      |
|                     |           |                                      |                         |                 | Female | 830            | 161.2 (160.4, 162.0)                     | 161.0 (160.4, 161.6) | 161.1 (160.4, 161.8) |                       |                                                     |                                                       |         |            |                      |
|                     |           | NHS                                  | Imputed (0.980)         | 0.46 (C)        | Male   | 2,286          | Not applicable                           |                      |                      | 0.0007                | -0.038<br>(0.029)                                   |                                                       | 0.19    |            |                      |
|                     |           |                                      |                         |                 | Female |                |                                          |                      |                      |                       |                                                     |                                                       |         |            |                      |
|                     |           | PLCO                                 | Imputed (0.980)         | 0.46 (C)        | Male   | 2244           | 177.7 (177.1, 178.3)                     | 178.4 (178.0, 178.8) | 178.8 (178.3, 179.3) | 0.003                 | -0.087<br>(0.03)                                    |                                                       | 0.004   |            |                      |
|                     |           |                                      |                         |                 | Female |                |                                          |                      |                      |                       |                                                     |                                                       |         |            |                      |
|                     |           | SardiNIA                             | Imputed (1.000)         | 0.354 (C)       | Male   | 1,883          | 156.8 (155.1, 158.5)                     | 157.9 (156.9, 158.9) | 158.0 (157.1, 159.0) | 0.0062                | -0.078<br>(0.022)                                   |                                                       | 0.00189 |            |                      |
|                     |           |                                      |                         |                 | Female | 2,415          | 158.5 (147.7, 169.3)                     | 157.2 (155.7, 158.9) | 157.9 (157.2, 158.6) |                       |                                                     |                                                       |         |            |                      |
|                     |           | Combined GWA (N=15,821) <sup>b</sup> |                         |                 |        |                |                                          |                      |                      |                       |                                                     |                                                       |         | 29% (0.29) | 4.8x10 <sup>-5</sup> |
|                     |           | B) Follow-up studies                 |                         |                 |        |                |                                          |                      |                      |                       |                                                     |                                                       |         |            |                      |
|                     |           | USHT tall-<br>short                  | Genotyped               | 0.46 (C)        | Male   | 1,094          | Not applicable                           |                      |                      |                       | OR=0.9<br>[0.8-1.0]                                 |                                                       | 0.18    |            |                      |
|                     |           |                                      |                         |                 | Female | 1,095          |                                          |                      |                      |                       |                                                     |                                                       |         |            |                      |
|                     |           | FINRISK97                            | Genotyped               | 0.47 (C)        | Male   | 3934           | 175.0 (174.5, 175.5)                     | 175.2 (174.9, 175.5) | 175.6 (175.2, 176.1) | 0.001                 | -0.045<br>(0.016)                                   |                                                       | 0.0050  |            |                      |
|                     |           |                                      |                         |                 | Female | 3874           | 162.0 (161.5, 162.4)                     | 162.6 (162.3, 162.8) | 162.3 (162.0, 162.8) |                       |                                                     |                                                       |         |            |                      |
|                     |           | FUSION2<br>CTRL                      | Genotyped               | 0.46 (C)        | Male   | 747            | 173.8 (173.4, 174.2)                     | 174.6 (174.1, 175)   | 174.9 (174.5, 175.4) | 0.003                 | -0.078<br>(0.041)                                   |                                                       | 0.053   |            |                      |
|                     |           |                                      |                         |                 | Female | 474            | 159.8 (159.2, 160.3)                     | 160.8 (160.3, 161.4) | 160.6 (160, 161.1)   |                       |                                                     |                                                       |         |            |                      |
|                     |           | FUSION2<br>T2D                       | Genotyped               | 0.47 (C)        | Male   | 695            | 175.6 (175.1, 176.1)                     | 174.5 (174, 175)     | 174.9 (174.4, 175.4) | 0.00005               | 0.01<br>(0.041)                                     |                                                       | 0.80    |            |                      |
|                     |           |                                      |                         |                 | Female | 476            | 159.8 (159.3, 160.2)                     | 160.2 (159.6, 160.7) | 160.7 (160.1, 161.2) |                       |                                                     |                                                       |         |            |                      |

<sup>a</sup>Effect size and standard error are expressed in s.d. units. For the DGI GWAS, only the unrelated component of the study (N=2,448) was used to estimate the effect size. Combined effect sizes for the ‘Follow-up studies’ or ‘All studies’ did not use data from the case-control tall-short USHT panel. <sup>b</sup>Combined P-values were calculated using a weighted Z-score method. Combined effect sizes were calculated using the inverse variance method, assuming a fixed effect.

**Supplementary Table 7 (continued)**

| Chr<br>(position)   | SNP       | Study                                | Imputation<br>(rsq_hat) | MAF<br>(allele) | Gender | Sample<br>size       | Mean height in cm (95% c.i.) by genotype |                      |                      | Variance<br>explained | Per T-<br>allele effect<br>size (s.e.) <sup>a</sup> | Hetero-<br>geneity <i>I</i> <sup>2</sup><br>(P-value) | P-value    |                      |
|---------------------|-----------|--------------------------------------|-------------------------|-----------------|--------|----------------------|------------------------------------------|----------------------|----------------------|-----------------------|-----------------------------------------------------|-------------------------------------------------------|------------|----------------------|
|                     |           |                                      |                         |                 |        |                      | GG                                       | GT                   | TT                   |                       |                                                     |                                                       |            |                      |
| 8<br>(57318152<br>) | rs9650315 | A) GWA                               |                         |                 |        |                      |                                          |                      |                      |                       |                                                     |                                                       |            |                      |
|                     |           | DGI CTRL                             | 0.12 (T)                | Male            | 709    | 175.6 (175.1, 176.1) | 175.5 (174.5, 176.6)                     | 173.1 (168.5, 177.8) | 0.002                | -0.087<br>(0.069)     | 0.71                                                |                                                       |            |                      |
|                     |           |                                      |                         | Female          | 758    | 162.5 (162.0, 163.0) | 162.5 (161.6, 163.4)                     | 160.9 (156.4, 165.4) |                      |                       |                                                     |                                                       |            |                      |
|                     |           | DGI T2D                              | 0.11 (T)                | Male            | 768    | 174.5 (174.0, 175.0) | 173.6 (172.6, 174.6)                     | 175.0 (167.2, 182.8) | 0.004                | -0.177<br>(0.064)     | 0.0089                                              |                                                       |            |                      |
|                     |           |                                      |                         | Female          | 743    | 161.1 (160.6, 161.6) | 160.1 (159.2, 161.0)                     | 159.3 (155.9, 162.7) |                      |                       |                                                     |                                                       |            |                      |
|                     |           | FUSION CTRL                          | 0.11 (T)                | Male            | 640    | 174.1 (173.6, 174.6) | 174.6 (174.1, 175.1)                     | 173.1 (172.6, 173.7) | 0.00003              | 0.012<br>(0.064)      | 0.85                                                |                                                       |            |                      |
|                     |           |                                      |                         | Female          | 647    | 160.7 (160.2, 161.2) | 160.5 (160.1, 161)                       | 161 (160.4, 161.6)   |                      |                       |                                                     |                                                       |            |                      |
|                     |           | FUSION T2D                           | 0.12 (T)                | Male            | 617    | 173.2 (172.7, 173.7) | 173.3 (172.9, 173.7)                     | 173.9 (173.5, 174.3) | 0.00088              | -0.066<br>(0.069)     | 0.34                                                |                                                       |            |                      |
|                     |           |                                      |                         | Female          | 467    | 159.6 (159.1, 160.1) | 159.6 (159.1, 160.1)                     | 157 (156.2, 157.7)   |                      |                       |                                                     |                                                       |            |                      |
|                     |           | KORA S3                              | Imputed (0.922)         | 0.14 (T)        | Male   | 813                  | 173.8 (173.3, 174.3)                     | 173.5 (172.6, 174.5) | 172.6 (169.7, 175.6) | Not available         | -0.154<br>(0.053)                                   | 0.0037                                                |            |                      |
|                     |           |                                      |                         |                 | Female | 830                  | 161.3 (160.8, 161.7)                     | 160.5 (159.6, 161.4) | 159.1 (155.2, 162.9) |                       |                                                     |                                                       |            |                      |
|                     |           | NHS                                  | Imputed (0.960)         | 0.15 (T)        | Male   | 2,286                | Not applicable                           |                      |                      | 0.0005                | -0.047<br>(0.043)                                   | 0.27                                                  |            |                      |
|                     |           |                                      |                         |                 | Female |                      | 164.1 (164.0, 164.2)                     | 163.6 (163.2, 164.0) | 162.9 (162.1, 163.7) |                       |                                                     |                                                       |            |                      |
|                     |           | PLCO                                 | Imputed (0.956)         | 0.13 (T)        | Male   | 2244                 | 178.6 (178.3, 178.9)                     | 177.6 (177.1, 178.2) | 178.6 (177.0, 180.2) | 0.0006                | -0.063<br>(0.044)                                   | 0.15                                                  |            |                      |
|                     |           |                                      |                         |                 | Female | Not applicable       |                                          |                      |                      |                       |                                                     |                                                       |            |                      |
|                     |           | SardiNIA                             | Imputed (0.900)         | 0.226 (T)       | Male   | 1,883                | 157.4 (156.6, 158.2)                     | 158.5 (157.3, 159.6) | 157.6 (154.8, 160.4) | 0.0060                | -0.088<br>(0.025)                                   | 0.00183                                               |            |                      |
|                     |           |                                      |                         |                 | Female | 2,415                | 157.9 (157.1, 158.7)                     | 158.4 (157.4, 159.4) | 154.9 (152.1, 157.8) |                       |                                                     |                                                       |            |                      |
|                     |           | Combined GWA (N=15,821) <sup>b</sup> |                         |                 |        |                      |                                          |                      |                      |                       |                                                     |                                                       | 46% (0.10) | 9.6x10 <sup>-6</sup> |
|                     |           | B) Follow-up studies                 |                         |                 |        |                      |                                          |                      |                      |                       |                                                     |                                                       |            |                      |
|                     |           | USHT tall-short                      | Genotyped               | 0.14 (T)        | Male   | 1,094                | Not applicable                           |                      |                      | OR=0.7<br>[0.6-0.8]   | 9.0x10 <sup>-6</sup>                                |                                                       |            |                      |
|                     |           |                                      |                         |                 | Female | 1,095                |                                          |                      |                      |                       |                                                     |                                                       |            |                      |
|                     |           | FINRISK97                            | Genotyped               | 0.12 (T)        | Male   | 3935                 | 175.3 (175.1, 175.6)                     | 175.2 (174.7, 175.6) | 175.4 (173.3, 177.5) | 0.0007                | -0.056<br>(0.024)                                   | 0.021                                                 |            |                      |
|                     |           |                                      |                         |                 | Female | 3877                 | 162.5 (162.3, 162.8)                     | 161.9 (161.4, 162.3) | 162.2 (160.5, 163.9) |                       |                                                     |                                                       |            |                      |
|                     |           | FUSION2 CTRL                         | Genotyped               | 0.13 (T)        | Male   | 739                  | 174.6 (174.2, 175.1)                     | 174.3 (173.9, 174.8) | 170.9 (170.4, 171.4) | 0.00103               | -0.069<br>(0.062)                                   | 0.27                                                  |            |                      |
|                     |           |                                      |                         |                 | Female | 470                  | 160.6 (160, 161.2)                       | 160 (159.5, 160.6)   | 160.8 (160.3, 161.3) |                       |                                                     |                                                       |            |                      |
|                     |           | FUSION2 T2D                          | Genotyped               | 0.12 (T)        | Male   | 685                  | 174.9 (174.4, 175.4)                     | 175.1 (174.6, 175.6) | 174.6 (174, 175.2)   | 0.00024               | -0.033<br>(0.062)                                   | 0.59                                                  |            |                      |
|                     |           |                                      |                         |                 | Female | 476                  | 160.2 (159.7, 160.8)                     | 160.2 (159.7, 160.7) | 159.3 (158.6, 159.9) |                       |                                                     |                                                       |            |                      |

---

**Combined follow-up studies (N=10,182)<sup>b</sup>**

26% (0.27)

0.010

**All studies (N=26,003)<sup>b</sup>** $3.8 \times 10^{-7}$ 

---

<sup>a</sup>Effect size and standard error are expressed in s.d. units. For the DGI GWAS, only the unrelated component of the study (N=2,448) was used to estimate the effect size. Combined effect sizes for the 'Follow-up studies' or 'All studies' did not use data from the case-control tall-short USHT panel. <sup>b</sup>Combined P-values were calculated using a weighted Z-score method. Combined effect sizes were calculated using the inverse variance method, assuming a fixed effect.

---

**Supplementary Table 7 (continued)**

| Chr<br>(position)    | SNP       | Study                                | Imputation<br>(rsq_hat) | MAF<br>(allele) | Gender | Sample<br>size | Mean height in cm (95% c.i.) by genotype |                         |                         | Variance<br>explained | Per T-<br>allele effect<br>size (s.e.) <sup>a</sup> | Hetero-<br>geneity <i>I</i> <sup>2</sup><br>(P-value) | P-value   |                       |
|----------------------|-----------|--------------------------------------|-------------------------|-----------------|--------|----------------|------------------------------------------|-------------------------|-------------------------|-----------------------|-----------------------------------------------------|-------------------------------------------------------|-----------|-----------------------|
|                      |           |                                      |                         |                 |        |                | CC                                       | CT                      | TT                      |                       |                                                     |                                                       |           |                       |
| 12<br>(64644614<br>) | rs1042725 | A) GWA                               |                         |                 |        |                |                                          |                         |                         |                       |                                                     |                                                       |           |                       |
|                      |           | DGI CTRL                             | Genotyped               | 0.46 (T)        | Male   | 725            | 175.7 (174.9,<br>176.5)                  | 175.9 (175.3,<br>176.5) | 174.9 (173.9,<br>175.9) | 0.003                 | -0.083<br>(0.042)                                   | 0.0027                                                |           |                       |
|                      |           |                                      |                         |                 | Female | 771            | 163.3 (162.6,<br>164.1)                  | 162.4 (161.8,<br>163.0) | 161.6 (160.7,<br>162.5) |                       |                                                     |                                                       |           |                       |
|                      |           | DGI T2D                              |                         | 0.48 (T)        | Male   | 779            | 174.8 (174.0,<br>175.7)                  | 174.1 (173.5,<br>174.8) | 174.0 (173.1,<br>174.9) | 0.006                 | -0.108<br>(0.037)                                   | 0.0030                                                |           |                       |
|                      |           |                                      |                         |                 | Female | 750            | 161.8 (160.9,<br>162.7)                  | 160.8 (160.2,<br>161.4) | 160.0 (159.2,<br>160.9) |                       |                                                     |                                                       |           |                       |
|                      |           | FUSION<br>CTRL                       | Imputed (0.985)         | 0.47 (T)        | Male   | 640            | 174.8 (174.3,<br>175.4)                  | 173.7 (173.2,<br>174.2) | 174.3 (173.8,<br>174.8) | 0.0019                | -0.061<br>(0.039)                                   | 0.12                                                  |           |                       |
|                      |           |                                      |                         |                 | Female | 647            | 161 (160.6,<br>161.5)                    | 160.7 (160.2,<br>161.2) | 160.2 (159.8,<br>160.7) |                       |                                                     |                                                       |           |                       |
|                      |           | FUSION<br>T2D                        |                         | 0.48 (T)        | Male   | 617            | 173.9 (173.4,<br>174.4)                  | 172.8 (172.3,<br>173.3) | 173.3 (172.9,<br>173.8) | 0.00031               | -0.025<br>(0.043)                                   | 0.57                                                  |           |                       |
|                      |           |                                      |                         |                 | Female | 467            | 158.9 (158.4,<br>159.4)                  | 159.9 (159.4,<br>160.4) | 159.6 (159.1,<br>160.1) |                       |                                                     |                                                       |           |                       |
|                      |           | KORA S3                              | Genotyped               | 0.49 (C)        | Male   | 813            | 174.5 (173.6,<br>175.5)                  | 173.8 (173.1,<br>174.4) | 172.9 (172.0,<br>173.7) | Not<br>available      | -0.097<br>(0.036)                                   | 0.0066                                                |           |                       |
|                      |           |                                      |                         |                 | Female | 830            | 161.3 (160.5,<br>162.1)                  | 161.1 (160.5,<br>161.7) | 160.7 (159.9,<br>161.5) |                       |                                                     |                                                       |           |                       |
|                      |           | NHS                                  | Imputed (0.995)         | 0.50 (T)        | Male   | 2,286          | Not applicable                           |                         |                         | 0.0079                | -0.122<br>(0.029)                                   | 2.5x10 <sup>-5</sup>                                  |           |                       |
|                      |           |                                      |                         |                 | Female |                | 164.9 (164.7,<br>165.1)                  | 163.9 (163.7,<br>164.1) | 163.2 (163.0,<br>163.4) |                       |                                                     |                                                       |           |                       |
|                      |           | PLCO                                 | Imputed (0.995)         | 0.49 (T)        | Male   | 2244           | 179.0 (178.5,<br>179.6)                  | 178.2 (177.9,<br>178.6) | 177.9 (177.4,<br>178.5) | 0.002                 | -0.062<br>(0.030)                                   | 0.04                                                  |           |                       |
|                      |           |                                      |                         |                 | Female | Not applicable |                                          |                         |                         |                       |                                                     |                                                       |           |                       |
|                      |           | SardiNIA                             | Genotyped               | 0.447 (C)       | Male   | 1,883          | 157.9 (156.5,<br>159.3)                  | 158.2 (157.2,<br>159.1) | 157.0 (157.1,<br>159.3) | 0.00024               | -0.046<br>(0.022)                                   | 0.0584                                                |           |                       |
|                      |           |                                      |                         |                 | Female | 2,415          | 157.3 (156.0,<br>158.6)                  | 158.0 (157.1,<br>158.9) | 158.2 (157.1,<br>159.3) |                       |                                                     |                                                       |           |                       |
|                      |           | Combined GWA (N=15,821) <sup>b</sup> |                         |                 |        |                |                                          |                         |                         |                       |                                                     |                                                       | 8% (0.51) | 2.6x10 <sup>-11</sup> |
|                      |           | B) Follow-up studies                 |                         |                 |        |                |                                          |                         |                         |                       |                                                     |                                                       |           |                       |
|                      |           | USHT tall-<br>short                  | Genotyped               | 0.48 (T)        | Male   | 1,094          | Not applicable                           |                         |                         | OR=0.8<br>[0.7-0.9]   | 4.2x10 <sup>-6</sup>                                |                                                       |           |                       |
|                      |           |                                      |                         |                 | Female | 1,095          |                                          |                         |                         |                       |                                                     |                                                       |           |                       |
|                      |           | FINRISK97                            | Genotyped               | 0.47 (T)        | Male   | 3955           | 175.8 (175.4,<br>176.2)                  | 175.3 (175.0,<br>175.6) | 174.7 (174.2,<br>175.1) | 0.002                 | -0.064<br>(0.016)                                   | 5.1x10 <sup>-5</sup>                                  |           |                       |
|                      |           |                                      |                         |                 | Female | 3895           | 162.6 (162.2,<br>163.0)                  | 162.4 (162.1,<br>162.7) | 161.9 (161.5,<br>162.3) |                       |                                                     |                                                       |           |                       |
|                      |           | FUSION2<br>CTRL                      | Genotyped               | 0.48 (T)        | Male   | 736            | 175.2 (174.8,<br>175.7)                  | 174.7 (174.2,<br>175.1) | 173.6 (173.2,<br>174)   | 0.0042                | -0.091<br>(0.041)                                   | 0.026                                                 |           |                       |
|                      |           |                                      |                         |                 | Female | 460            | 161.4 (160.9,<br>162)                    | 160.1 (159.5,<br>160.7) | 160.7 (160.2,<br>161.2) |                       |                                                     |                                                       |           |                       |
|                      |           | FUSION2<br>T2D                       | Genotyped               | 0.47 (T)        | Male   | 691            | 174.8 (174.3,<br>175.3)                  | 174.8 (174.3,<br>175.3) | 174.6 (174.1,<br>175)   | 0.0018                | -0.061<br>(0.041)                                   | 0.14                                                  |           |                       |
|                      |           |                                      |                         |                 | Female | 468            | 161 (160.5,<br>161.5)                    | 160.1 (159.5,<br>160.6) | 159.7 (159.2,<br>160.2) |                       |                                                     |                                                       |           |                       |

|                                                    |           |          |        |      |                      |                      |                      |       |                |                       |
|----------------------------------------------------|-----------|----------|--------|------|----------------------|----------------------|----------------------|-------|----------------|-----------------------|
| PPP                                                | Genotyped | 0.49 (T) | Male   | 1611 | 177.8 (177.2, 178.5) | 176.9 (176.4, 177.4) | 176.4 (175.8, 177.1) | 0.006 | -0.106 (0.024) | 9.5x10 <sup>-5</sup>  |
|                                                    |           |          | Female | 1791 | 164.5 (163.9, 165.0) | 164.0 (163.5, 164.4) | 163.3 (162.7, 163.8) |       |                |                       |
| Combined follow-up studies (N=13,604) <sup>b</sup> |           |          |        |      |                      |                      |                      |       | 0% (0.71)      | 1.7x10 <sup>-10</sup> |
| All studies (N=29,425) <sup>b</sup>                |           |          |        |      |                      |                      |                      |       |                | 2.7x10 <sup>-20</sup> |

<sup>a</sup>Effect size and standard error are expressed in s.d. units. For the DGI GWAS, only the unrelated component of the study (N=2,448) was used to estimate the effect size. Combined effect sizes for the ‘Follow-up studies’ or ‘All studies’ did not use data from the case-control tall-short USHT panel. <sup>b</sup>Combined P-values were calculated using a weighted Z-score method. Combined effect sizes were calculated using the inverse variance method, assuming a fixed effect.

**Supplementary Table 7 (continued)**

| Chr<br>(position)    | SNP       | Study                                             | Imputation<br>(rsq_hat) | MAF<br>(allele) | Gender | Sample<br>size | Mean height in cm (95% c.i.) by genotype |                         |                          | Variance<br>explained | Per T-<br>allele effect<br>size (s.e.) <sup>a</sup> | Hetero-<br>geneity <i>I</i> <sup>2</sup><br>(P-value) | P-value   |                       |
|----------------------|-----------|---------------------------------------------------|-------------------------|-----------------|--------|----------------|------------------------------------------|-------------------------|--------------------------|-----------------------|-----------------------------------------------------|-------------------------------------------------------|-----------|-----------------------|
|                      |           |                                                   |                         |                 |        |                | CC                                       | CT                      | TT                       |                       |                                                     |                                                       |           |                       |
| 14<br>(91529711<br>) | rs8007661 | A) GWA                                            |                         |                 |        |                |                                          |                         |                          |                       |                                                     |                                                       |           |                       |
|                      |           | DGI CTRL                                          | Imputed (0.590)         | 0.25 (T)        | Male   | 709            | 175.8 (175.1,<br>176.4)                  | 175.2 (174.6,<br>175.9) | 176.8 (174.5,<br>179.1)  | 0.00008               | -0.027<br>(0.062)                                   | 0.15                                                  |           |                       |
|                      |           |                                                   |                         |                 | Female | 758            | 162.5 (161.9,<br>163.0)                  | 162.7 (162.0,<br>163.3) | 161.2 (159.3,<br>163.2)  |                       |                                                     |                                                       |           |                       |
|                      |           | DGI T2D                                           | Imputed (0.590)         | 0.24 (T)        | Male   | 768            | 174.2 (173.6,<br>174.7)                  | 174.6 (173.8,<br>175.3) | 173.0 (171.0,<br>175.0)  | 0.0006                | -0.03<br>(0.058)                                    | 0.83                                                  |           |                       |
|                      |           |                                                   |                         |                 | Female | 743            | 161.0 (160.4,<br>161.6)                  | 160.7 (160.0,<br>161.4) | 160.5 (158.5,<br>162.6)  |                       |                                                     |                                                       |           |                       |
|                      |           | FUSION<br>CTRL                                    | Imputed (0.670)         | 0.24 (T)        | Male   | 640            | 174.6 (174.1,<br>175.1)                  | 173.8 (173.3,<br>174.4) | 172.1 (171.6,<br>172.6)  | 0.0027                | -0.084<br>(0.05)                                    | 0.12                                                  |           |                       |
|                      |           |                                                   |                         |                 | Female | 647            | 160.8 (160.3,<br>161.2)                  | 160.7 (160.3,<br>161.1) | 159.9 (159.4,<br>160.4)  |                       |                                                     |                                                       |           |                       |
|                      |           | FUSION<br>T2D                                     | Imputed (0.670)         | 0.23 (T)        | Male   | 617            | 173.5 (173.1,<br>174)                    | 172.8 (172.3,<br>173.3) | 172.8 (172.3,<br>173.3)  | 0.0034                | -0.096<br>(0.062)                                   | 0.12                                                  |           |                       |
|                      |           |                                                   |                         |                 | Female | 467            | 159.8 (159.3,<br>160.3)                  | 159 (158.5,<br>159.6)   | 160.5 (160,<br>160.9)    |                       |                                                     |                                                       |           |                       |
|                      |           | KORA S3                                           | Imputed (0.50)          | 0.26 (T)        | Male   | 813            | 174 (173.4 ,<br>174.6 )                  | 173.3 (172.6,<br>174 )  | 174.2 (172.2,<br>176.2 ) | Not<br>available      | -0.092<br>(0.054)                                   | 0.086                                                 |           |                       |
|                      |           |                                                   |                         |                 | Female | 830            | 161.2 (160.6,<br>161.7)                  | 161.1 (160.4,<br>161.7) | 159.9 (158 ,<br>161.9)   |                       |                                                     |                                                       |           |                       |
|                      |           | NHS                                               | Genotyped               | 0.46 (T)        | Male   | 2,286          | Not applicable                           |                         |                          | 0.0008                | -0.039<br>(0.029)                                   | 0.18                                                  |           |                       |
|                      |           |                                                   |                         |                 | Female |                | 164.1 (163.8,<br>164.4)                  | 163.9 (163.7,<br>164.1) | 163.9 (163.6,<br>164.2)  |                       |                                                     |                                                       |           |                       |
|                      |           | PLCO                                              | Genotyped               | 0.49 (T)        | Male   | 2243           | 179.0 (178.5,<br>179.6)                  | 178.5 (178.1,<br>178.8) | 177.4 (176.8,<br>177.9)  | 0.009                 | -0.130<br>(0.030)                                   | 0.00001                                               |           |                       |
|                      |           |                                                   |                         |                 | Female | Not applicable |                                          |                         |                          |                       |                                                     |                                                       |           |                       |
|                      |           | SardiNIA                                          | Imputed (0.450)         | 0.217 (T)       | Male   | 1,883          | 157.7 (156.8,<br>158.5)                  | 158.1 (157.0,<br>159.2) | 156.1 (152.3,<br>159.9)  | 0.0040                | -0.072<br>(0.026)                                   | 0.0135                                                |           |                       |
|                      |           |                                                   |                         |                 | Female | 2,415          | 157.8 (157.0,<br>158.6)                  | 158.2 (157.2,<br>159.2) | 158.0 (155.0,<br>161.0)  |                       |                                                     |                                                       |           |                       |
|                      |           | Combined GWA (N=15,821) <sup>b</sup>              |                         |                 |        |                |                                          |                         |                          |                       |                                                     |                                                       | 0% (0.63) | 8.9x10 <sup>-8</sup>  |
|                      |           | B) Follow-up studies                              |                         |                 |        |                |                                          |                         |                          |                       |                                                     |                                                       |           |                       |
|                      |           | USHT tall-<br>short                               | Genotyped               | 0.43 (T)        | Male   | 1,094          | Not applicable                           |                         |                          |                       | OR=1.0<br>[0.9-1.1]                                 | 0.64                                                  |           |                       |
|                      |           |                                                   |                         |                 | Female | 1,095          |                                          |                         |                          |                       |                                                     |                                                       |           |                       |
|                      |           | FINRISK97                                         | Genotyped               | 0.47 (T)        | Male   | 3933           | 175.6 (175.2,<br>176.0)                  | 175.4 (175.1,<br>175.7) | 174.5 (174.0,<br>175.0)  | 0.001                 | -0.051<br>(0.016)                                   | 0.0015                                                |           |                       |
|                      |           |                                                   |                         |                 | Female | 3874           | 162.5 (162.2,<br>162.9)                  | 162.3 (162.1,<br>162.6) | 162.2 (161.8,<br>162.7)  |                       |                                                     |                                                       |           |                       |
|                      |           | Combined follow-up studies (N=7,803) <sup>b</sup> |                         |                 |        |                |                                          |                         |                          |                       |                                                     |                                                       | n.a.      | 0.0015                |
|                      |           | All studies (N=23,624) <sup>b</sup>               |                         |                 |        |                |                                          |                         |                          |                       |                                                     |                                                       |           | 5.5x10 <sup>-10</sup> |

<sup>a</sup>Effect size and standard error are expressed in s.d. units. For the DGI GWAS, only the unrelated component of the study (N=2,448) was used to estimate the effect size. Combined effect sizes for the 'Follow-up studies' or 'All studies' did not use data from the case-control tall-short USHT panel. <sup>b</sup>Combined P-values were calculated using a weighted Z-score method. Combined effect sizes were calculated using the inverse variance method, assuming a fixed effect.

**Supplementary Table 7 (continued)**

| Chr<br>(position)    | SNP       | Study                                             | Imputation<br>(rsq_hat) | MAF<br>(allele) | Gender | Sample<br>size | Mean height in cm (95% c.i.) by genotype |                      |                      | Variance<br>explained | Per G-<br>allele effect<br>size (s.e.) <sup>a</sup> | Hetero-<br>geneity <i>I</i> <sup>2</sup><br>(P-value) | P-value |           |                      |
|----------------------|-----------|---------------------------------------------------|-------------------------|-----------------|--------|----------------|------------------------------------------|----------------------|----------------------|-----------------------|-----------------------------------------------------|-------------------------------------------------------|---------|-----------|----------------------|
|                      |           |                                                   |                         |                 |        |                | AA                                       | AG                   | GG                   |                       |                                                     |                                                       |         |           |                      |
| 15<br>(82077496<br>) | rs2562784 | A) GWA                                            |                         |                 |        |                |                                          |                      |                      |                       |                                                     |                                                       |         |           |                      |
|                      |           | DGI CTRL                                          | Genotyped               | 0.25 (G)        | Male   | 717            | 175.3 (174.7, 175.9)                     | 175.7 (175.0, 176.5) | 177.6 (175.8, 179.4) | 0.005                 | 0.109<br>(0.048)                                    |                                                       | 0.0047  |           |                      |
|                      |           |                                                   |                         |                 | Female | 768            | 162.2 (161.6, 162.8)                     | 162.9 (162.3, 163.5) | 163.0 (161.4, 164.6) |                       |                                                     |                                                       |         |           |                      |
|                      |           | DGI T2D                                           |                         | 0.25 (G)        | Male   | 771            | 173.9 (173.3, 174.5)                     | 174.8 (174.1, 175.6) | 175.1 (173.3, 176.9) | 0.006                 | 0.123<br>(0.044)                                    |                                                       | 0.0089  |           |                      |
|                      |           |                                                   |                         |                 | Female | 745            | 160.5 (159.9, 161.1)                     | 161.5 (160.8, 162.2) | 160.3 (158.6, 162.0) |                       |                                                     |                                                       |         |           |                      |
|                      |           | FUSION<br>CTRL                                    | Imputed (0.973)         | 0.26 (G)        | Male   | 640            | 173.9 (173.3, 174.4)                     | 174.5 (174, 175)     | 175.2 (174.7, 175.7) | 0.0018                | 0.069<br>(0.046)                                    |                                                       | 0.13    |           |                      |
|                      |           |                                                   |                         |                 | Female | 647            | 160.5 (160, 161)                         | 160.5 (160, 160.9)   | 163.2 (162.7, 163.7) |                       |                                                     |                                                       |         |           |                      |
|                      |           | FUSION<br>T2D                                     |                         | 0.24 (G)        | Male   | 617            | 173.7 (173.2, 174.2)                     | 172.4 (172, 172.9)   | 173.2 (172.7, 173.7) | 0.00058               | -0.039<br>(0.051)                                   |                                                       | 0.45    |           |                      |
|                      |           |                                                   |                         |                 | Female | 467            | 159.3 (158.8, 159.8)                     | 160 (159.5, 160.5)   | 159.5 (159.1, 160)   |                       |                                                     |                                                       |         |           |                      |
|                      |           | KORA S3                                           | Genotyped               | 0.26 (G)        | Male   | 813            | 173.6 (173, 174.2)                       | 173.8 (173.1, 174.5) | 174.3 (172.5, 176)   | Not<br>available      | 0.073<br>(0.042)                                    |                                                       | 0.079   |           |                      |
|                      |           |                                                   |                         |                 | Female | 830            | 160.7 (160.2, 161.3)                     | 161.5 (160.8, 162.2) | 161.2 (159.6, 162.9) |                       |                                                     |                                                       |         |           |                      |
|                      |           | NHS                                               | Imputed (1.00)          | 0.23 (G)        | Male   | 2,286          | Not applicable                           |                      |                      | 0.00005               | -0.012<br>(0.035)                                   |                                                       | 0.74    |           |                      |
|                      |           |                                                   |                         |                 | Female |                |                                          |                      |                      |                       |                                                     |                                                       |         |           |                      |
|                      |           | PLCO                                              | Genotyped               | 0.23 (G)        | Male   | 2240           | 178.2 (177.8, 178.5)                     | 178.6 (178.1, 179.0) | 178.9 (177.7, 180.2) | 0.002                 | 0.074<br>(0.036)                                    |                                                       | 0.04    |           |                      |
|                      |           |                                                   |                         |                 | Female |                |                                          |                      |                      |                       |                                                     |                                                       |         |           |                      |
|                      |           | SardiNIA                                          | Genotyped               | 0.306 (G)       | Male   | 1,883          | 157.8 (156.9, 158/7)                     | 157.6 (156.8, 158.9) | 157.4 (155.6, 159.2) | 0.0012                | 0.036<br>(0.022)                                    |                                                       | 0.152   |           |                      |
|                      |           |                                                   |                         |                 | Female | 2,415          | 157.7 (156.8, 158.5)                     | 157.8 (156.9, 158.8) | 159.8 (157.9, 161.6) |                       |                                                     |                                                       |         |           |                      |
|                      |           | Combined GWA (N=15,821) <sup>b</sup>              |                         |                 |        |                |                                          |                      |                      |                       |                                                     |                                                       |         | 3% (0.54) | 2.9x10 <sup>-5</sup> |
|                      |           | B) Follow-up studies                              |                         |                 |        |                |                                          |                      |                      |                       |                                                     |                                                       |         |           |                      |
|                      |           | USHT tall-<br>short                               | Genotyped               | 0.24 (G)        | Male   | 1,094          | Not applicable                           |                      |                      |                       | OR=1.1<br>[1.0-1.2]                                 |                                                       | 0.28    |           |                      |
|                      |           |                                                   |                         |                 | Female | 1,095          |                                          |                      |                      |                       |                                                     |                                                       |         |           |                      |
|                      |           | FINRISK97                                         | Genotyped               | 0.26 (G)        | Male   | 3961           | 175.1 (174.8, 175.4)                     | 175.5 (175.1, 175.8) | 176.1 (175.3, 176.9) | 0.002                 | 0.062<br>(0.018)                                    |                                                       | 0.00055 |           |                      |
|                      |           |                                                   |                         |                 | Female | 3905           | 162.1 (161.8, 162.4)                     | 162.6 (162.3, 162.9) | 162.8 (162.0, 163.6) |                       |                                                     |                                                       |         |           |                      |
|                      |           | Combined follow-up studies (N=7,803) <sup>b</sup> |                         |                 |        |                |                                          |                      |                      |                       |                                                     |                                                       |         | n.a.      | 0.00055              |
|                      |           | All studies (N=23,624) <sup>b</sup>               |                         |                 |        |                |                                          |                      |                      |                       |                                                     |                                                       |         |           | 6.4x10-8             |

<sup>a</sup>Effect size and standard error are expressed in s.d. units. For the DGI GWAS, only the unrelated component of the study (N=2,448) was used to estimate the effect size. Combined effect sizes for the 'Follow-up studies' or 'All studies' did not use data from the case-control tall-short USHT panel. <sup>b</sup>Combined P-values were calculated using a weighted Z-score method. Combined effect sizes were calculated using the inverse variance method, assuming a fixed effect.

Supplementary Table 7 (continued)

| Chr<br>(position) | SNP        | Study                                      | Imputation<br>(rsq_hat) | MAF<br>(allele) | Gender | Sample<br>size | Mean height in cm (95% c.i.) by genotype |                      |                      | Variance<br>explained | Per T-<br>allele effect<br>size (s.e.) <sup>a</sup> | Hetero-<br>geneity <i>I</i> <sup>2</sup><br>(P-value) | P-value    |                      |
|-------------------|------------|--------------------------------------------|-------------------------|-----------------|--------|----------------|------------------------------------------|----------------------|----------------------|-----------------------|-----------------------------------------------------|-------------------------------------------------------|------------|----------------------|
|                   |            |                                            |                         |                 |        |                | AA                                       | AT                   | TT                   |                       |                                                     |                                                       |            |                      |
| 19<br>(2121954)   | rs12986413 | <b>A) GWA</b>                              |                         |                 |        |                |                                          |                      |                      |                       |                                                     |                                                       |            |                      |
|                   |            | DGI CTRL                                   |                         | 0.49 (T)        | Male   | 709            | 174.9 (174.0, 175.7)                     | 175.8 (175.1, 176.4) | 176.1 (175.2, 177.0) | 0.001                 | 0.05<br>(0.043)                                     |                                                       | 0.24       |                      |
|                   |            |                                            | Imputed (0.966)         |                 | Female | 758            | 162.3 (161.5, 163.2)                     | 162.6 (162.0, 163.2) | 162.5 (161.7, 163.3) |                       |                                                     |                                                       |            |                      |
|                   |            | DGI T2D                                    |                         | 0.47 (T)        | Male   | 768            | 173.8 (173.0, 174.6)                     | 174.4 (173.7, 175.1) | 174.6 (173.7, 175.4) | 0.0002                | -0.021<br>(0.039)                                   |                                                       | 0.70       |                      |
|                   |            |                                            |                         |                 | Female | 743            | 161.4 (160.6, 162.2)                     | 160.7 (160.1, 161.3) | 160.5 (159.6, 161.5) |                       |                                                     |                                                       |            |                      |
|                   |            | FUSION CTRL                                |                         | 0.47 (T)        | Male   | 640            | 173.5 (173, 174)                         | 174.5 (173.9, 175)   | 174.4 (173.9, 174.9) | 0.0016                | 0.056<br>(0.039)                                    |                                                       | 0.16       |                      |
|                   |            |                                            | Imputed (0.990)         |                 | Female | 647            | 159.9 (159.4, 160.3)                     | 161 (160.5, 161.5)   | 161.1 (160.6, 161.5) |                       |                                                     |                                                       |            |                      |
|                   |            | FUSION T2D                                 |                         | 0.48 (T)        | Male   | 617            | 173 (172.6, 173.5)                       | 173.2 (172.7, 173.7) | 173.5 (173, 174)     | 0.00059               | 0.034<br>(0.044)                                    |                                                       | 0.43       |                      |
|                   |            |                                            |                         |                 | Female | 467            | 159.3 (158.7, 159.8)                     | 159.6 (159.1, 160.1) | 159.7 (159.2, 160.2) |                       |                                                     |                                                       |            |                      |
|                   |            | KORA S3                                    | Imputed (0.895)         | 0.50 (A)        | Male   | 813            | 172.7 (171.9, 173.5)                     | 174.1 (173.4, 174.7) | 173.9 (172.9, 174.8) | Not<br>available      | 0.096<br>(0.037)                                    |                                                       | 0.0097     |                      |
|                   |            |                                            |                         |                 | Female | 830            | 160.7 (159.9, 161.5)                     | 160.9 (160.3, 161.4) | 161.9 (161.0, 162.7) |                       |                                                     |                                                       |            |                      |
|                   |            | NHS                                        | Imputed (0.969)         | 0.47 (T)        | Male   | 2,286          | Not applicable                           |                      |                      | 0.0024                | 0.069<br>(0.030)                                    |                                                       | 0.019      |                      |
|                   |            |                                            |                         |                 | Female |                | 163.3 (163.0, 163.6)                     | 164.2 (164.0, 164.4) | 164.3 (164.0, 164.6) |                       |                                                     |                                                       |            |                      |
|                   |            | PLCO                                       | Imputed (0.971)         | 0.48 (T)        | Male   | 2244           | 178.2 (177.7, 178.7)                     | 178.5 (178.1, 178.9) | 178.3 (177.7, 178.9) | 0.00005               | 0.008<br>(0.030)                                    |                                                       | 0.79       |                      |
|                   |            |                                            |                         |                 | Female |                | Not applicable                           |                      |                      |                       |                                                     |                                                       |            |                      |
|                   |            | SardiNIA                                   | Imputed (0.881)         | 0.43 (A)        | Male   | 1,883          | 159.4 (157.9, 160.9)                     | 157.4 (156.5, 156.3) | 157.4 (156.2, 158.5) | 0.0069                | 0.080<br>(0.023)                                    |                                                       | 0.0026     |                      |
|                   |            |                                            |                         |                 | Female | 2,415          | 157.2 (155.9, 158.6)                     | 158.0 (157.1, 158.9) | 158.4 (157.3, 159.4) |                       |                                                     |                                                       |            |                      |
|                   |            | <b>Combined GWA (N=15,821)<sup>b</sup></b> |                         |                 |        |                |                                          |                      |                      |                       |                                                     |                                                       | 23% (0.36) | 2.0x10 <sup>-5</sup> |
|                   |            | <b>B) Follow-up studies</b>                |                         |                 |        |                |                                          |                      |                      |                       |                                                     |                                                       |            |                      |
|                   |            | USHT tall-short                            | Genotyped               | 0.48 (T)        | Male   | 1,094          | Not applicable                           |                      |                      |                       | OR=1.1<br>[1.0-1.2]                                 |                                                       | 0.20       |                      |
|                   |            |                                            |                         |                 | Female | 1,095          |                                          |                      |                      |                       |                                                     |                                                       |            |                      |
|                   |            | FINRISK97                                  | Genotyped               | 0.46 (T)        | Male   | 3932           | 174.9 (174.5, 175.3)                     | 175.5 (175.2, 175.8) | 175.5 (175.0, 176.0) | 0.0002                | 0.020<br>(0.016)                                    |                                                       | 0.20       |                      |
|                   |            |                                            |                         |                 | Female | 3871           | 162.4 (162.0, 162.7)                     | 162.2 (161.9, 162.5) | 162.8 (162.4, 163.3) |                       |                                                     |                                                       |            |                      |
|                   |            | FUSION2 CTRL                               | Genotyped               | 0.46 (T)        | Male   | 718            | 174.6 (174.1, 175.1)                     | 174.4 (174, 174.9)   | 174.9 (174.5, 175.3) | 0.00052               | 0.032<br>(0.042)                                    |                                                       | 0.44       |                      |
|                   |            |                                            |                         |                 | Female | 452            | 160.3 (159.8, 160.9)                     | 160.7 (160.1, 161.3) | 160.7 (160.2, 161.3) |                       |                                                     |                                                       |            |                      |
|                   |            | FUSION2 T2D                                | Genotyped               | 0.45 (T)        | Male   | 681            | 173.6 (173.1, 174.1)                     | 175.6 (175.1, 176.1) | 175 (174.4, 175.5)   | 0.00765               | 0.124<br>(0.041)                                    |                                                       | 0.0023     |                      |
|                   |            |                                            |                         |                 | Female | 465            | 159.3 (158.8, 159.8)                     | 160.2 (159.6, 160.7) | 161.6 (161, 162.1)   |                       |                                                     |                                                       |            |                      |

|                                                    |           |          |        |      |                      |                      |                      |       |               |                      |
|----------------------------------------------------|-----------|----------|--------|------|----------------------|----------------------|----------------------|-------|---------------|----------------------|
| PPP                                                | Genotyped | 0.45 (T) | Male   | 1611 | 176.9 (176.4, 177.5) | 177.1 (176.6, 177.5) | 177.2 (176.4, 177.9) | 0.003 | 0.073 (0.025) | 0.0029               |
|                                                    |           |          | Female | 1791 | 163.3 (162.8, 163.8) | 164.0 (163.6, 164.4) | 164.6 (163.9, 165.2) |       |               |                      |
| Combined follow-up studies (N=13,604) <sup>b</sup> |           |          |        |      |                      |                      |                      |       | 60% (0.08)    | 3.7x10 <sup>-4</sup> |
| All studies (N=29,425) <sup>b</sup>                |           |          |        |      |                      |                      |                      |       |               | 2.9x10 <sup>-8</sup> |

<sup>a</sup>Effect size and standard error are expressed in s.d. units. For the DGI GWAS, only the unrelated component of the study (N=2,448) was used to estimate the effect size. Combined effect sizes for the ‘Follow-up studies’ or ‘All studies’ did not use data from the case-control tall-short USHT panel. <sup>b</sup>Combined P-values were calculated using a weighted Z-score method. Combined effect sizes were calculated using the inverse variance method, assuming a fixed effect.

Supplementary Table 7 (continued)

| Chr<br>(position)    | SNP       | Study                                | Imputation<br>(rsq_hat) | MAF<br>(allele) | Gender | Sample<br>size | Mean height in cm (95% c.i.) by genotype |                      |                      | Variance<br>explained | Per C-<br>allele effect<br>size (s.e.) <sup>a</sup> | Hetero-<br>geneity <i>I</i> <sup>2</sup><br>(P-value) | P-value   |                       |
|----------------------|-----------|--------------------------------------|-------------------------|-----------------|--------|----------------|------------------------------------------|----------------------|----------------------|-----------------------|-----------------------------------------------------|-------------------------------------------------------|-----------|-----------------------|
|                      |           |                                      |                         |                 |        |                | CC                                       | CT                   | TT                   |                       |                                                     |                                                       |           |                       |
| 20<br>(33370575<br>) | rs6060369 | A) GWA                               |                         |                 |        |                |                                          |                      |                      |                       |                                                     |                                                       |           |                       |
|                      |           | DGI CTRL                             | Genotyped               | 0.43 (C)        | Male   | 725            | 175.2 (174.0, 176.3)                     | 176.0 (175.4, 176.6) | 175.2 (174.5, 176.0) | 0.002                 | 0.068<br>(0.042)                                    | 0.037                                                 |           |                       |
|                      |           |                                      |                         |                 | Female | 771            | 163.3 (162.3, 164.3)                     | 162.5 (161.9, 163.2) | 162.0 (161.3, 162.7) |                       |                                                     |                                                       |           |                       |
|                      |           | DGI T2D                              | Genotyped               | 0.45 (C)        | Male   | 779            | 175.2 (174.2, 176.2)                     | 174.2 (173.6, 174.8) | 173.9 (173.0, 174.7) | 0.002                 | 0.061<br>(0.038)                                    |                                                       |           |                       |
|                      |           |                                      |                         |                 | Female | 750            | 161.1 (160.2, 162.0)                     | 160.9 (160.2, 161.5) | 160.9 (160.1, 161.7) |                       |                                                     |                                                       |           |                       |
|                      |           | FUSION<br>CTRL                       | Genotyped               | 0.46 (C)        | Male   | 636            | 175.1 (174.5, 175.6)                     | 174 (173.5, 174.6)   | 173.8 (173.3, 174.3) | 0.00695               | 0.118<br>(0.04)                                     | 0.0028                                                |           |                       |
|                      |           |                                      |                         |                 | Female | 642            | 161.3 (160.8, 161.7)                     | 160.9 (160.5, 161.4) | 159.9 (159.4, 160.4) |                       |                                                     |                                                       |           |                       |
|                      |           | FUSION<br>T2D                        | Genotyped               | 0.42 (C)        | Male   | 610            | 173.9 (173.4, 174.4)                     | 173.2 (172.7, 173.6) | 173.1 (172.6, 173.5) | 0.00261               | 0.073<br>(0.04)                                     | 0.093                                                 |           |                       |
|                      |           |                                      |                         |                 | Female | 464            | 159.8 (159.2, 160.3)                     | 159.8 (159.3, 160.3) | 159 (158.5, 159.5)   |                       |                                                     |                                                       |           |                       |
|                      |           | KORA S3                              | Genotyped               | 0.40 (C)        | Male   | 813            | 174.3 (173.3, 175.4)                     | 173.9 (173.3, 174.6) | 173.1 (172.4, 173.8) | Not<br>available      | 0.056<br>(0.037)                                    | 0.13                                                  |           |                       |
|                      |           |                                      |                         |                 | Female | 830            | 161.4 (160.2, 162.5)                     | 160.9 (160.3, 161.4) | 161.2 (160.5, 161.9) |                       |                                                     |                                                       |           |                       |
|                      |           | NHS                                  | Imputed (0.985)         | 0.39 (C)        | Male   | 2,286          | Not applicable                           |                      |                      | 0.0001                | 0.011<br>(0.030)                                    | 0.72                                                  |           |                       |
|                      |           |                                      |                         |                 | Female |                | 164.2 (163.9, 164.5)                     | 163.9 (163.7, 164.1) | 163.9 (163.6, 164.2) |                       |                                                     |                                                       |           |                       |
|                      |           | PLCO                                 | Imputed (0.984)         | 0.38 (C)        | Male   | 2244           | 179.0 (178.2, 179.7)                     | 178.5 (178.2, 178.9) | 177.9 (177.5, 178.3) | 0.003                 | 0.095<br>(0.031)                                    | 0.002                                                 |           |                       |
|                      |           |                                      |                         |                 | Female | Not applicable |                                          |                      |                      |                       |                                                     |                                                       |           |                       |
|                      |           | SardiNIA                             | Genotyped               | 0.384 (C)       | Male   | 1,883          | 157.6 (155.7, 159.5)                     | 157.7(156.9, 158.6)  | 157.9 (156.8, 159.0) | 0.0072                | 0.083<br>(0.021)                                    | 0.000435                                              |           |                       |
|                      |           |                                      |                         |                 | Female | 2,415          | 158.5 (156.8, 160.2)                     | 157.6 (156.8, 158.4) | 158.2 (157.1, 159.3) |                       |                                                     |                                                       |           |                       |
|                      |           | Combined GWA (N=15,821) <sup>b</sup> |                         |                 |        |                |                                          |                      |                      |                       |                                                     |                                                       | 0% (0.58) | 1.9x10 <sup>-10</sup> |
|                      |           | B) Follow-up studies                 |                         |                 |        |                |                                          |                      |                      |                       |                                                     |                                                       |           |                       |
|                      |           | USHT tall-<br>short                  | Genotyped               | 0.38 (C)        | Male   | 1,094          | Not applicable                           |                      |                      | OR=1.2<br>[1.0-1.3]   |                                                     | 0.012                                                 |           |                       |
|                      |           |                                      |                         |                 | Female | 1,095          |                                          |                      |                      |                       |                                                     |                                                       |           |                       |
|                      |           | FINRISK97                            | Genotyped               | 0.45 (C)        | Male   | 3930           | 175.5 (175.1, 176.0)                     | 175.3 (174.9, 175.6) | 175.1 (174.7, 175.5) | 0.001                 | 0.051<br>(0.016)                                    | 0.0014                                                |           |                       |
|                      |           |                                      |                         |                 | Female | 3869           | 162.8 (162.4, 163.3)                     | 162.4 (162.1, 162.7) | 162.0 (161.6, 162.4) |                       |                                                     |                                                       |           |                       |
|                      |           | FUSION2<br>CTRL                      | Genotyped               | 0.45 (C)        | Male   | 728            | 175.6 (175.2, 176.1)                     | 174.3 (173.9, 174.8) | 174.4 (173.9, 174.8) | 0.0053                | 0.103<br>(0.04)                                     | 0.0090                                                |           |                       |
|                      |           |                                      |                         |                 | Female | 475            | 161 (160.4, 161.6)                       | 160.3 (159.8, 160.9) | 160.4 (159.9, 161)   |                       |                                                     |                                                       |           |                       |
|                      |           | FUSION2<br>T2D                       | Genotyped               | 0.46 (C)        | Male   | 690            | 175.5 (175, 175.9)                       | 175.1 (174.6, 175.6) | 174 (173.5, 174.5)   | 0.0025                | 0.071<br>(0.041)                                    | 0.084                                                 |           |                       |
|                      |           |                                      |                         |                 | Female | 464            | 160.7 (160.2, 161.1)                     | 160.3 (159.7, 160.8) | 160.2 (159.6, 160.7) |                       |                                                     |                                                       |           |                       |

|                                                          |           |          |        |      |                         |                         |                         |       |                  |                       |
|----------------------------------------------------------|-----------|----------|--------|------|-------------------------|-------------------------|-------------------------|-------|------------------|-----------------------|
| PPP                                                      | Genotyped | 0.42 (C) | Male   | 1611 | 177.1 (176.4,<br>177.9) | 177.4 (176.9,<br>177.8) | 176.5 (176.0,<br>177.1) | 0.003 | 0.078<br>(0.024) | 0.0014                |
|                                                          |           |          | Female | 1791 | 164.3 (163.6,<br>165.1) | 164.0 (163.6,<br>164.4) | 163.6 (163.1,<br>164.0) |       |                  |                       |
| <b>Combined follow-up studies (N=13,604)<sup>b</sup></b> |           |          |        |      |                         |                         |                         |       | 0% (0.78)        | 1.3x10 <sup>-7</sup>  |
| <b>All studies (N=29,425)<sup>b</sup></b>                |           |          |        |      |                         |                         |                         |       |                  | 1.4x10 <sup>-16</sup> |

<sup>a</sup>Effect size and standard error are expressed in s.d. units. For the DGI GWAS, only the unrelated component of the study (N=2,448) was used to estimate the effect size. Combined effect sizes for the 'Follow-up studies' or 'All studies' did not use data from the case-control tall-short USHT panel. <sup>b</sup>Combined P-values were calculated using a weighted Z-score method. Combined effect sizes were calculated using the inverse variance method, assuming a fixed effect.

**Supplementary Table 8. Analysis of stratification in the DGI panel.** Association results in DGI unrelated (N=2,364) before and after correction for residual population stratification using principal component methods implemented in EIGENSTRAT.

| SNP        | Uncorrected P-value | Adjusted P-value |
|------------|---------------------|------------------|
| rs724016   | 0.1649              | 0.1517           |
| rs2916448  | 0.1601              | 0.1767           |
| rs1662845  | 0.8320              | 0.6040           |
| rs1812175  | 0.0055              | 0.0024           |
| rs1492820  | 0.0009              | 0.0006           |
| rs1450822  | 0.1173              | 0.1027           |
| rs10946808 | 0.0438              | 0.0914           |
| rs314277   | 0.1747              | 0.1314           |
| rs4896582  | 0.1343              | 0.1393           |
| rs12540874 | 0.1521              | 0.1170           |
| rs2040494  | 0.3577              | 0.4139           |
| rs2730245  | 0.0026              | 0.0035           |
| rs11786297 | 0.1608              | 0.2084           |
| rs9650315  | 0.3131              | 0.2582           |
| rs13249999 | 0.1279              | 0.1265           |
| rs7869550  | 0.0396              | 0.0312           |
| rs7466269  | 0.0038              | 0.0086           |
| rs1042725  | 0.0002              | 0.0005           |
| rs17104630 | 0.0244              | 0.0260           |
| rs3783937  | 0.0010              | 0.0010           |
| rs8007661  | 0.4482              | 0.4949           |
| rs11858942 | 0.1367              | 0.1178           |
| rs2562784  | 0.0010              | 0.0011           |
| rs763014   | 0.8326              | 0.7391           |
| rs26840    | 0.6592              | 0.8011           |
| rs12449568 | 0.1972              | 0.1750           |
| rs12958987 | 0.0218              | 0.0163           |
| rs12986413 | 0.7586              | 0.8531           |
| rs6116651  | 0.0250              | 0.0273           |
| rs6060369  | 0.0288              | 0.0309           |

**Supplementary Table 9. Stratified analysis by geographical regions in the FINRISK97 DNA panel.**

| SNP        | Unstratified analysis | Stratified analysis by region |
|------------|-----------------------|-------------------------------|
|            | P-value               | P-value                       |
| rs724016   | $4.3 \times 10^{-8}$  | $3.5 \times 10^{-8}$          |
| rs2916448  | 0.41                  | 0.40                          |
| rs1662845  | 0.93                  | 0.96                          |
| rs1812175  | 0.00012               | $1.4 \times 10^{-4}$          |
| rs1492820  | 0.035                 | 0.035                         |
| rs1450822  | FAILED                | FAILED                        |
| rs10946808 | $4.9 \times 10^{-5}$  | $4.6 \times 10^{-5}$          |
| rs314277   | 0.41                  | 0.38                          |
| rs4896582  | $1.4 \times 10^{-9}$  | $1.2 \times 10^{-9}$          |
| rs12540874 | 0.62                  | 0.59                          |
| rs2040494  | 0.0050                | 0.0049                        |
| rs2730245  | 0.38                  | 0.43                          |
| rs11786297 | 0.063                 | 0.069                         |
| rs9650315  | 0.021                 | 0.023                         |
| rs13249999 | 0.30                  | 0.28                          |
| rs7869550  | 0.10                  | 0.11                          |
| rs7466269  | 0.047                 | 0.049                         |
| rs1042725  | $5.1 \times 10^{-5}$  | $7.4 \times 10^{-5}$          |
| rs17104630 | 0.021                 | 0.020                         |
| rs3783937  | 0.59                  | 0.63                          |
| rs8007661  | 0.0015                | 0.0017                        |
| rs11858942 | 0.96                  | 0.97                          |
| rs2562784  | 0.00055               | $3.4 \times 10^{-4}$          |
| rs763014   | 0.96                  | 0.92                          |
| rs26840    | FAILED                | FAILED                        |
| rs12449568 | 0.64                  | 0.66                          |
| rs12958987 | 0.16                  | 0.13                          |
| rs12986413 | 0.21                  | 0.19                          |
| rs6116651  | 0.67                  | 0.66                          |
| rs6060369  | 0.0014                | 0.0013                        |

## Supplementary Note

### Membership of DGI

#### Diabetes Genetics Initiative of Broad Institute of Harvard and Massachusetts Institute of Technology, Lund University and Novartis Institutes for BioMedical Research

*\* NPB, PIWdB, VL, RS and BFV contributed equally to the original DGI scan and are listed alphabetically.*

**Site 1** (Massachusetts General Hospital, Children's Hospital, Harvard Medical School, Broad Institute of Harvard and MIT)

\*Noël P. Burt<sup>1,3</sup>, \*Paul I.W. de Bakker<sup>1,2,4,5,10</sup>, \*Richa Saxena<sup>1,3-5,10</sup>, \*Benjamin F. Voight<sup>1,4</sup>, Kristin Ardlie<sup>1</sup>, Rachel Barry<sup>2</sup>, Brendan Blumenstiel<sup>2</sup>, Wendy Brodeur<sup>2</sup>, Jody Camarata<sup>2</sup>, Nancy Chia<sup>2</sup>, Matthew DeFelice<sup>2</sup>, Mary Fava<sup>2</sup>, Jose C. Florez<sup>1,3-5,9,11</sup>, Stacey B. Gabriel<sup>2</sup>, Diane Gage<sup>2</sup>, Casey Gates<sup>2</sup>, John Gibbons<sup>2</sup>, Lauren Gianniny<sup>1</sup>, Candace Guiducci<sup>1</sup>, Rachel Hackett<sup>1</sup>, Bob Handsaker<sup>2</sup>, Claire Healy<sup>2</sup>, Sekar Kathiresan<sup>1,3,7,8,11</sup>, Guillaume Lettre<sup>1,3,13,14</sup>, Helen N. Lyon<sup>1,3,12,14</sup>, Vamsi K. Mootha<sup>3,4</sup>, Christopher Newton-Cheh<sup>1,8</sup>, Marcia Nizzari<sup>2</sup>, Kieu Nguyen<sup>2</sup>, Melissa Parkin<sup>2</sup>, Shaun Purcell<sup>1,4</sup>, Carrie Sougnez<sup>2</sup>, Elizabeth K. Speliotes<sup>1,3,11</sup>, Aarti Surti<sup>1</sup>, Ryan Tewhey<sup>1</sup>, Joel N. Hirschhorn<sup>1,3,10,12-14</sup>, Mark J. Daly<sup>1,3,4,6,11</sup>, David Altshuler<sup>1,3-6,9-11</sup>

**Site 2** (Lund University, University of Helsinki)

\*Valeriya Lyssenko<sup>15</sup>, Peter Almgren<sup>15</sup>, Anna Berglund<sup>15</sup>, Johan Holmkvist<sup>15</sup>, Bo Isomaa<sup>16,19</sup>, Esa Laurila<sup>15</sup>, Olle Melander<sup>15</sup>, Marju Orho-Melander<sup>15</sup>, Peter Nilsson<sup>15</sup>, Hemang Parikh<sup>15</sup>, Marketa Sjögren<sup>15</sup>, Malin Svensson<sup>15</sup>, Margareta Svensson<sup>15</sup>, Kristina Bengtsson<sup>17</sup>, Ulf Lindblad<sup>17</sup>, Marja-Riitta Taskinen<sup>16</sup>, Tiinamaija Tuomi<sup>18,19</sup>, Leif Groop<sup>15,18</sup>

**Site 3** (Novartis Institutes for BioMedical Research)

Hong Chen<sup>20</sup>, Gung-Wei Chirn<sup>20</sup>, Qicheng Ma<sup>20</sup>, Darrell Ricke<sup>20</sup>, Delwood Richardson<sup>20</sup>, Jeffrey J. Roix<sup>20</sup>, Joanne Meyer<sup>20</sup>, Thomas E. Hughes<sup>20</sup>

<sup>1</sup>Program in Medical and Population Genetics, <sup>2</sup>Genetic Analysis Platform, and <sup>3</sup>Metabolic Disease Initiative, Broad Institute of Harvard and Massachusetts Institute of Technology, Seven Cambridge Center, Cambridge, Massachusetts 02142, USA. <sup>4</sup>Center for Human Genetic Research, <sup>5</sup>Department of Molecular Biology and <sup>6</sup>Medicine, <sup>7</sup>Cardiovascular Disease Prevention Center, <sup>8</sup>Cardiology Division, and <sup>9</sup>Diabetes Unit, Massachusetts General Hospital, 185 Cambridge Street, CPZN-6818, Boston, Massachusetts 02114-2790, USA. <sup>10</sup>Department of Genetics, <sup>11</sup>Medicine and <sup>12</sup>Pediatrics, Harvard Medical School, Boston, Massachusetts, USA. <sup>13</sup>Division of Endocrinology and <sup>14</sup>Genetics, Children's Hospital, Boston, Massachusetts, USA. <sup>15</sup>Department of Clinical Sciences, Diabetes and Endocrinology Research Unit, University Hospital Malmö, Lund University, Malmö, Sweden. <sup>16</sup>Malmska Municipal Health Center and Hospital, Jakobstad, Finland. <sup>17</sup>Skaraborg Institute, Skövde, Sweden. <sup>18</sup>Department of Medicine, Helsinki University Hospital, University of Helsinki, Helsinki, Finland. <sup>19</sup>Folkhälsan Research Center, Helsinki, Finland. <sup>20</sup>Diabetes and Metabolism Disease Area, Novartis Institutes for BioMedical Research, 100 Technology Square, Cambridge, Massachusetts, USA.

### Membership of FUSION

## Finland United States Investigation of NIDDM Genetics

Anne U. Jackson<sup>1</sup>, Cristen J. Willer<sup>1</sup>, Lori L. Bonnycastle<sup>2</sup>, Amy J. Swift<sup>2</sup>, Heather M. Stringham<sup>1</sup>, William L. Duren<sup>1</sup>, Laura J. Scott<sup>1</sup>, Michael R. Erdos<sup>2</sup>, Parimal A. Deodhar<sup>2</sup>, Kari A. Kubalanza<sup>2</sup>, Mario A. Morken<sup>2</sup>, Matthew G. Rees<sup>2</sup>, Narisu Narisu<sup>2</sup>, Peter S. Chines<sup>2</sup>, Peggy P. White<sup>1</sup>, Timo T. Valle<sup>3</sup>, Thomas A. Buchanan<sup>4</sup>, Richard M. Watanabe<sup>5,6</sup>, Richard N. Bergman<sup>6</sup>, Jaakko Tuomilehto<sup>3,7,8</sup>, Francis S. Collins<sup>2</sup>, Michael Boehnke<sup>1</sup>, and Karen L. Mohlke<sup>9</sup>

<sup>1</sup>Department of Biostatistics and Center for Statistical Genetics, University of Michigan, Ann Arbor, Michigan

<sup>2</sup>Genome Technology Branch, National Human Genome Research Institute, Bethesda, Maryland

<sup>3</sup>Diabetes Unit, Department of Epidemiology and Health Promotion, National Public Health Institute, Helsinki, Finland

<sup>4</sup>Division of Endocrinology, Keck School of Medicine, University of Southern California, Los Angeles, California

<sup>5</sup>Department of Preventive Medicine, Keck School of Medicine, University of Southern California, Los Angeles, California

<sup>6</sup>Department of Physiology and Biophysics, Keck School of Medicine, University of Southern California, Los Angeles, California

<sup>7</sup>Department of Public Health, University of Helsinki, Helsinki, Finland

<sup>8</sup>South Ostrobothnia Central Hospital, Seinäjoki, Finland

<sup>9</sup>Department of Genetics, University of North Carolina, Chapel Hill, North Carolina

## Membership of SardinIA

### Gene-finding and longitudinal study for age-associated conditions in a Sardinian population cohort.

*Authors are listed by site, and within each site alphabetically, with the exception that within each site team leaders are listed at the front, and PI's are at the end.*

#### Site 1 (Istituto di Neurogenetica e Neurofarmacologia, CNR, Monserrato, Italy)

Manuela Uda<sup>1</sup>, Giuseppe Albai<sup>1</sup>, Angelo Scuteri<sup>1,2</sup>, Marcello Argiolas<sup>1</sup>, Monica Balloi<sup>1</sup>, Fabio Busonero<sup>1</sup>, Anna Cau<sup>1</sup>, M. Valeria Cerchi<sup>1</sup>, Laura Crisponi<sup>1</sup>, Marina D'aquila<sup>1</sup>, Mariano Dei<sup>1</sup>, Barbara Deiana<sup>1</sup>, Manila Deiana<sup>1</sup>, Liana Ferrelli<sup>1</sup>, Pietro Figus<sup>1</sup>, Danilo Fois<sup>1</sup>, Monica Lai<sup>1</sup>, Sandra Lai<sup>1</sup>, Francesco Loi<sup>1</sup>, Paola Loi<sup>1</sup>, Marco Masala<sup>1,3</sup>, Andrea Maschio<sup>1</sup>, Massimo Muggianu<sup>1</sup>, Antonella Mulas<sup>1</sup>, Silvia Naitza<sup>1</sup>, Nazario Olla<sup>1</sup>, Marco Orrù<sup>1</sup>, M. Grazia Pilia<sup>1</sup>, M. Grazia Piras<sup>1</sup>, Natascia Sestu<sup>1</sup>, M. Cristina Spada<sup>1</sup>, Gianluca Usala<sup>1</sup>, Antonio Cao<sup>1</sup>

#### Site 2 (National Institute of Aging, Baltimore, MD)

Nagaraja Ramaiah<sup>4</sup>, Luigi Ferrucci<sup>5</sup>, Edward Lakatta<sup>4</sup>, Samer S. Najjar<sup>4</sup>, James Strait<sup>4</sup>, Kirill Tarasov<sup>4</sup>, Alan B. Zonderman<sup>4</sup>, David Schlessinger<sup>4</sup>

#### Site 3 (University of Michigan, Ann Arbor, MI)

Serena Sanna<sup>1,6</sup>, Wei-Min Chen<sup>6</sup>, Paul Scheet<sup>6</sup>, Gonçalo R. Abecasis<sup>6</sup>

<sup>1</sup>Istituto di Neurogenetica e Neurofarmacologia (INN), Consiglio Nazionale delle Ricerche, c/o Cittadella Universitaria di Monserrato, Monserrato, Cagliari 09042, Italy

<sup>2</sup>Unità Operativa Geriatria, Istituto per la Patologia Endocrina e Metabolica, Rome, Italy

<sup>3</sup>U.O. Semplice Cardiologia, Div. Medicina, P.O. S. Barabara, Iglesias, Italy;

<sup>4</sup>Gerontology Research Center, National Institute on Aging, 5600 Nathan Shock Drive, Baltimore, MD 21224, USA

<sup>5</sup>Clinical Research Branch, National Institute on Aging, Baltimore, Maryland, United States of America

<sup>6</sup>Center for Statistical Genetics, Department of Biostatistics, University of Michigan, Ann Arbor, MI 48109

## Membership of KORA

Cooperative health research in the Region of Augsburg (KORA)

KORA study group consists of H.-Erich Wichmann<sup>1,2</sup> (speaker), Rolf Holle<sup>3</sup>, Jürgen John<sup>3</sup>, Thomas Illig<sup>2</sup>, Christa Meisinger<sup>1</sup>, Annette Peters<sup>1</sup>, and their coworkers, who are responsible for the design and conduct of the KORA studies. The KORA S3/F3 500K study was conducted by Christian Gieger<sup>1,2</sup>, Guido Fischer<sup>1</sup>, Iris M. Heid<sup>1,2</sup>, Susana Eyheramendy<sup>1,2</sup>, Norman Klopp<sup>1,2</sup>, Peter Lichtner<sup>4</sup>, Gertrud Eckstein<sup>4</sup>, Thomas Illig<sup>2</sup>, H.-Erich Wichmann<sup>1,2</sup>, and Thomas Meitinger<sup>4,5</sup>

<sup>1</sup>Institute of Epidemiology, GSF - National Research Center for Environment and Health, 85764 Neuherberg, Germany. <sup>2</sup>Chair of Epidemiology, IBE, University of Munich, 81377 Munich, Germany.

<sup>3</sup>Institute of Health Economics and Health Care Management, GSF-National Research Centre for Environment and Health, 85764 Neuherberg, Germany. <sup>4</sup>Institute of Human Genetics, GSF National Research Center for Environment and Health, 85764 Neuherberg, Germany, <sup>5</sup>Institute of Human Genetics, Technical University, 81765 Munich, Germany

## Membership of PLCO-CGEMS Prostate Cancer GWAS and Anthropometry Initiative

Sonja Berndt<sup>1</sup>, Meredith Yeager<sup>1,2</sup>, Kevin B. Jacobs<sup>3</sup>, Sholom Wacholder<sup>1</sup>, Kai Yu<sup>1</sup>, Nilanjan Chatterjee<sup>1</sup>, Robert Welch<sup>1,2</sup>, Gerald L. Andriole<sup>4</sup>, E. David Crawford<sup>5</sup>, Margaret Tucker<sup>1</sup>, Daniela S. Gerhard<sup>6</sup>, Joseph F. Fraumeni, Jr.<sup>1</sup>, Robert Hoover<sup>1</sup>, David J. Hunter<sup>1,7</sup>, Gilles Thomas<sup>1</sup>, Stephen J Chanock<sup>1,8</sup>, Richard B. Hayes<sup>1</sup>

<sup>1</sup> Division of Cancer Epidemiology and Genetics, National Cancer Institute, National Institutes of Health, Department of Health and Human Services

<sup>2</sup> SAIC-Frederick, NCI-FCRDC, Frederick, MD

<sup>3</sup> Bioinformed Consulting Services, Gaithersburg, MD

<sup>4</sup> Division of Urologic Surgery, Washington University School of Medicine, St. Louis, MO

<sup>5</sup> Department of Urologic Oncology, University of Colorado Health Sciences Center, Aurora, CO

<sup>6</sup> Office of Cancer Genomics, NCI, NIH, DHHS

<sup>7</sup> Program in Molecular and Genetic Epidemiology, Department of Epidemiology, Harvard School of Public Health, Boston, Massachusetts

<sup>8</sup> Pediatric Oncology Branch, Center for Cancer Research, NCI, NIH, DHHS

## Supplementary Figure Legends

**Supplementary Figure 1. Overall study design to identify and validate new height loci.** Height association results from six GWA scans (N=15,821) were combined using a meta-analytic Z-score-based method. Top ranking SNPs were then genotyped in a European American tall-short (5<sup>th</sup>-10<sup>th</sup> and 90<sup>th</sup>-95<sup>th</sup> percentiles of the height distribution) screening panel (N=2,189). SNPs with odds ratio consistent with the direction of the effect observed in the meta-analysis were finally genotyped in large follow-up panels.

**Supplementary Figure 2. Regional plots of 12 replicated associations to adult height.** Genotyped or imputed SNPs are plotted with their meta-analytic P-values ( $-\log_{10}(\text{P-value})$ ) versus their genomic position (NCBI build 35). In each panel, the SNP with the most significant association in the combined analysis is listed (blue diamond) and its initial P-value in the height meta-analysis (red diamond). Estimated recombination rates (taken from HapMap CEU) are plotted to reflect the local LD structure around the associated SNPs and their correlated proxies (red =  $r^2 \geq 0.8$ ; orange =  $0.5 \leq r^2 < 0.8$ ; yellow =  $0.2 \leq r^2 < 0.5$ ). Gene annotations were taken from the UCSC genome browser.

- Supplementary Figure 1 -

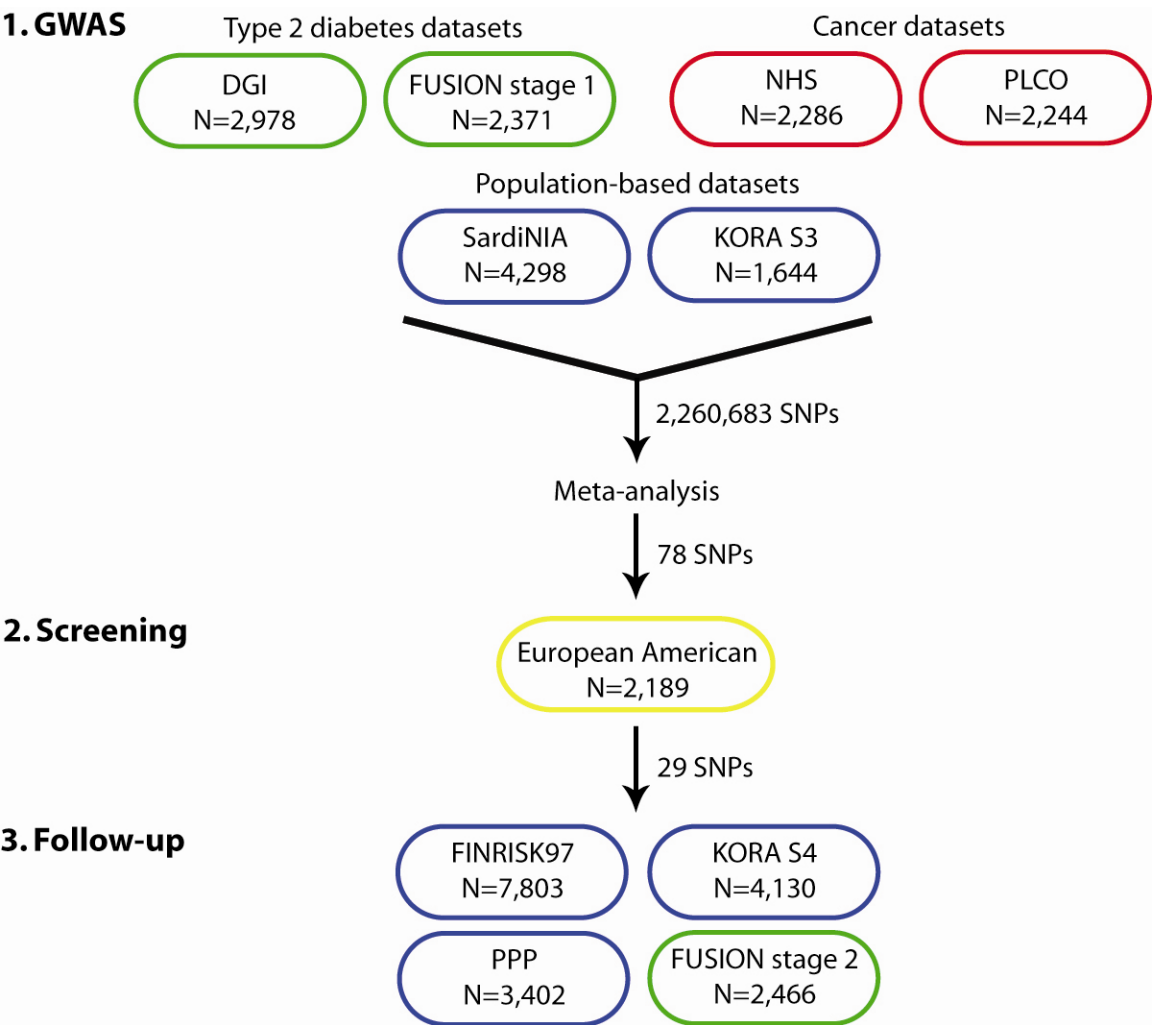

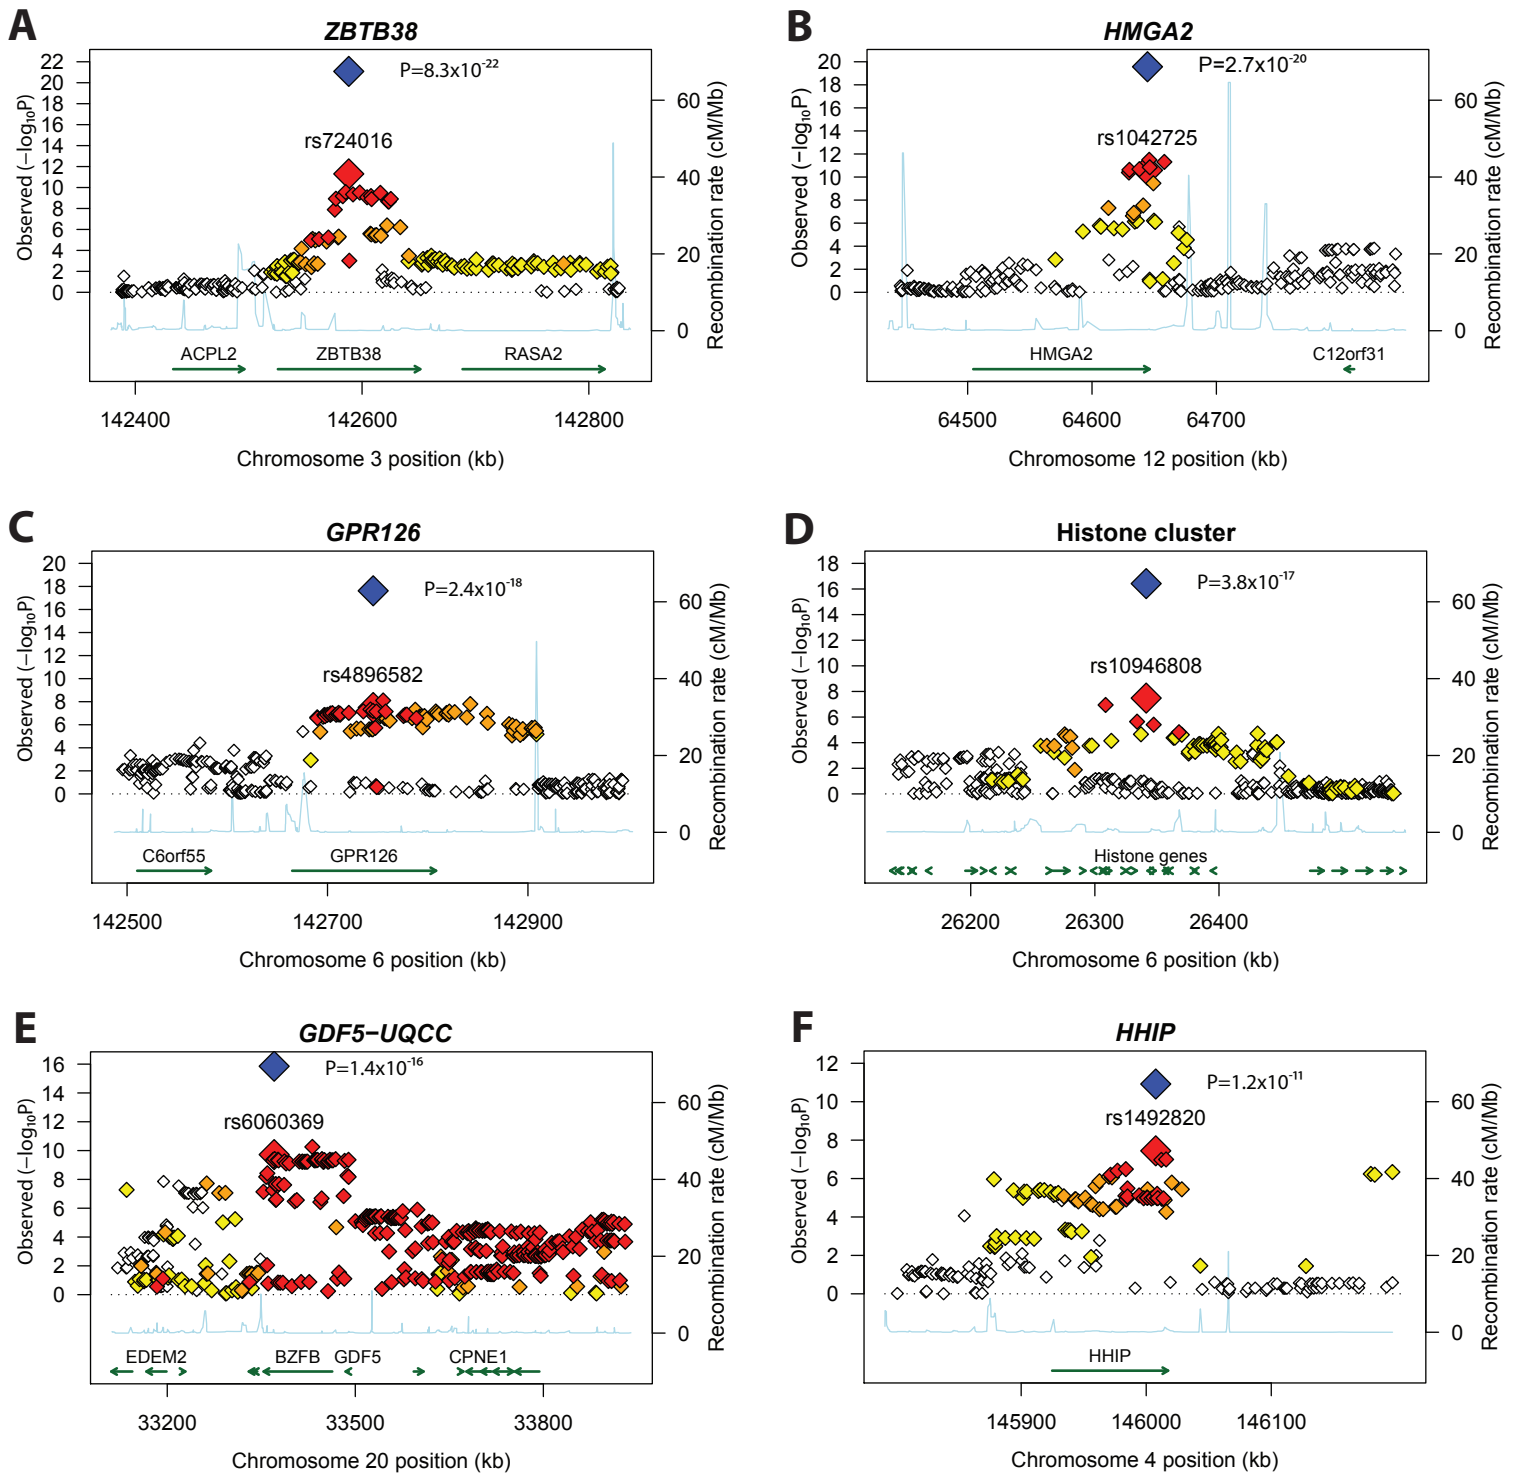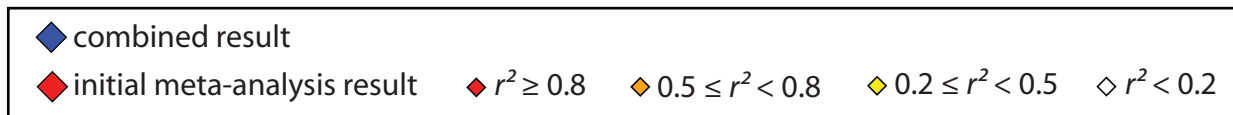

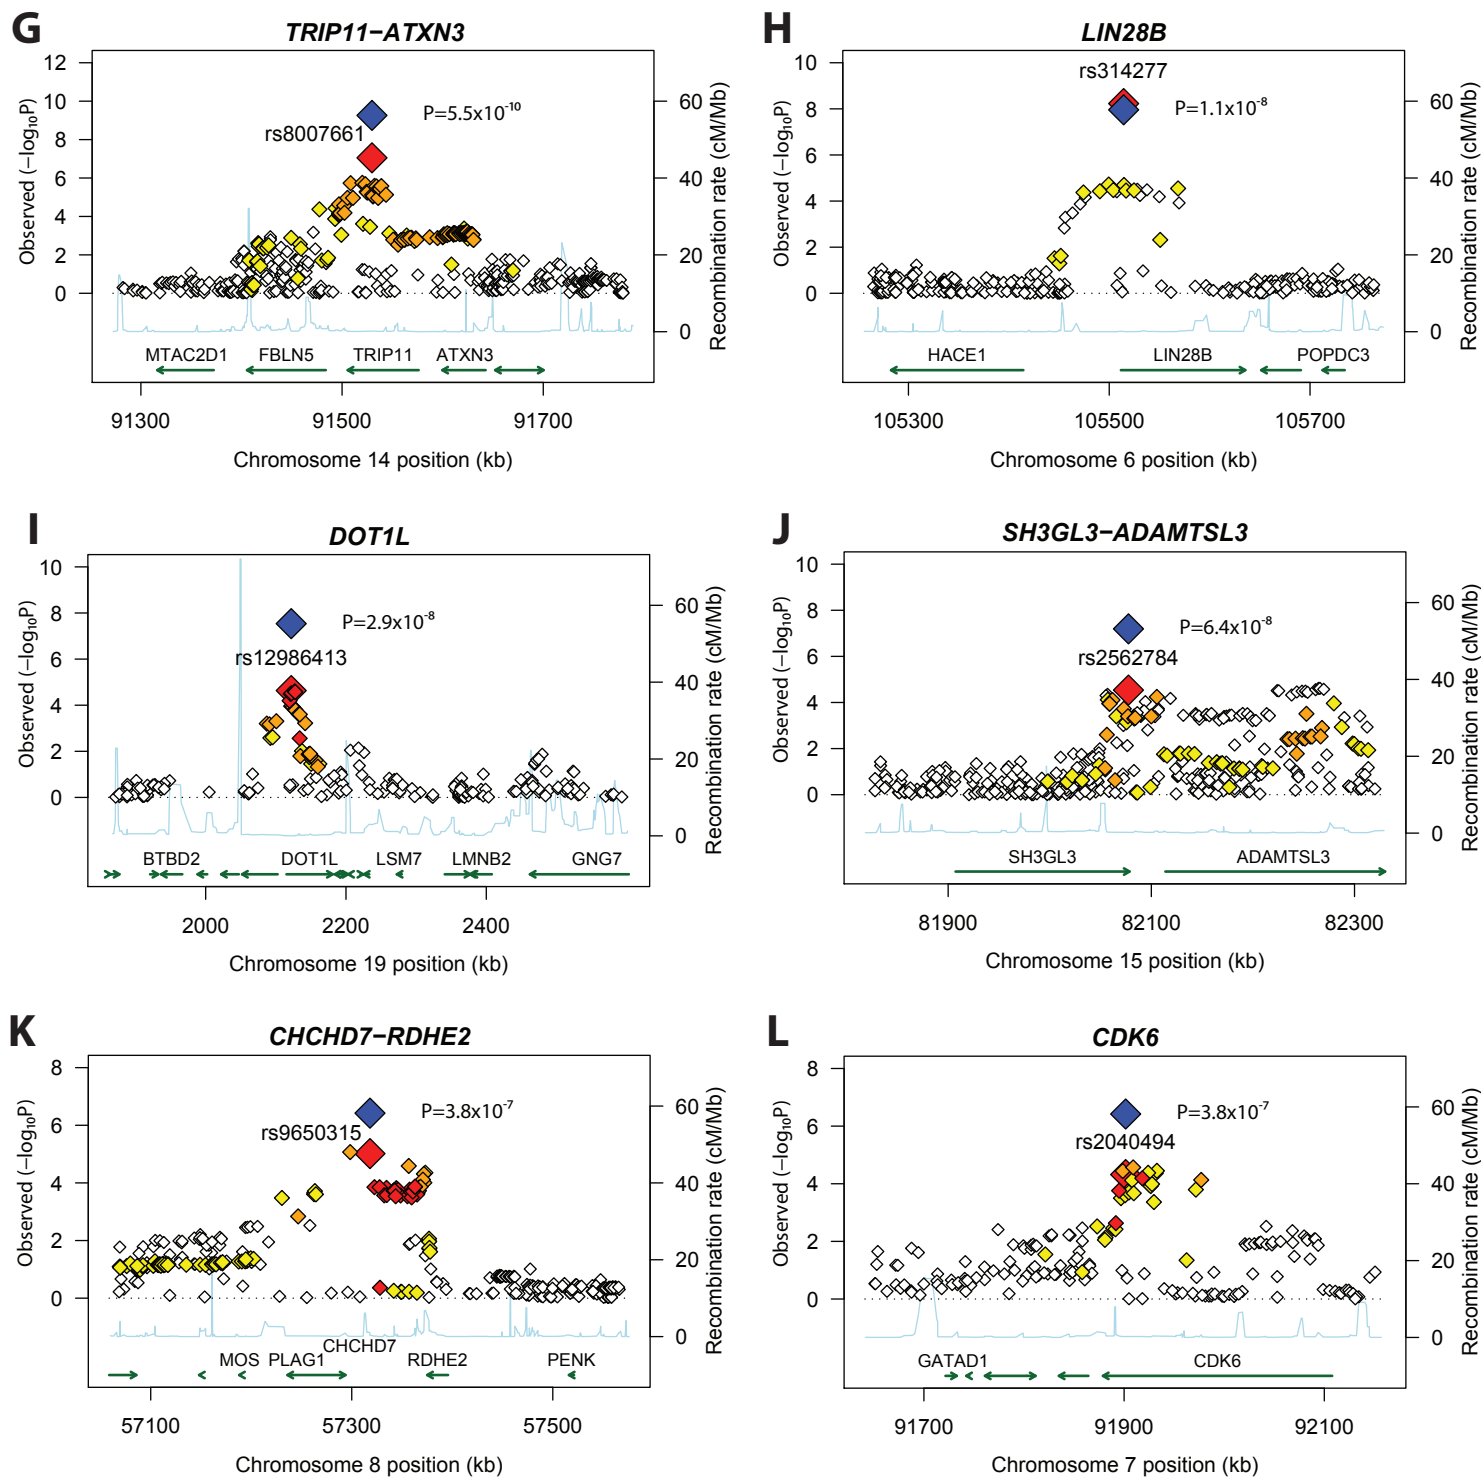

◆ combined result  
◆ initial meta-analysis result    ◆  $r^2 \geq 0.8$     ◆  $0.5 \leq r^2 < 0.8$     ◆  $0.2 \leq r^2 < 0.5$     ◆  $r^2 < 0.2$
